# Supplementary material for: Proof of ion-pair structures in ammonium-based protic ionic liquids using combined NMR and DFT/PCM-based chemical shift calculations
Source: Royal Society of Chemistry journal article supplement (doi:10.1039/c7cp04481j), 2017-01-01
Supplement: c7cp04481j1.pdf [file c7cp04481j1.pdf]

## Supporting Information

### Proof of Ion-Pair Structures in Ammonium-Based Protic Ionic Liquids Using Combined NMR and DFT/PCM-Based Chemical Shift Calculations

M. Lozynski<sup>a</sup>, J. Pernak<sup>a</sup>, Z. Gdaniec<sup>b</sup>, B. Górski<sup>a</sup> and F. Béguin<sup>\*,a</sup>

<sup>a</sup>Faculty of Chemical Technology, Poznan University of Technology, Berdychowo 4, 60-965 Poznan, Poland

<sup>b</sup>Institute of Bioorganic Chemistry, Polish Academy of Sciences, Noskowskiego 12/14, 61-704 Poznan, Poland

**Table SI 1.** Absolute<sup>a)</sup> and relative energies<sup>b)</sup> in the gas phase and the Boltzmann population<sup>c,d)</sup> for different relative dispositions of ions for the [(C<sub>2</sub>H<sub>5</sub>)<sub>3</sub>NH][TFSI] ion pair, calculated at the DFT-B3LYP/6-31G(d) and B3LYP/6-31++G(d,p) basis set levels of theory.

| Ion pair  | B3LYP/6-31G(d)  |                 |                      |           | B3LYP/6-31++G(d,p) |                 |                      |
|-----------|-----------------|-----------------|----------------------|-----------|--------------------|-----------------|----------------------|
|           | absolute energy | relative energy | Boltzmann population |           | absolute energy    | relative energy | Boltzmann population |
| <b>1a</b> | -2120.1532774   | 0.02            | 31.5                 | <b>1a</b> | -2120.2452567      | 0.16            | 24.8                 |
| <b>1b</b> | -2120.1533165   | 0.00            | 32.8                 | <b>1b</b> | -2120.2452695      | 0.15            | 25.2                 |
| <b>1c</b> | -2120.1457502   | 4.75            |                      | <b>1c</b> | -2120.2388727      | 4.17            |                      |
| <b>2a</b> | -2120.1520576   | 0.79            | 8.6                  | <b>2a</b> | -2120.2449119      | 0.38            | 17.3                 |
| <b>2b</b> | -2120.1531347   | 0.11            | 27.0                 | <b>2b</b> | -2120.2455150      | 0.00            | 32.7                 |
| <b>2c</b> | -2120.1424046   | 6.85            |                      | <b>2c</b> | -2120.2373401      | 5.13            |                      |
| <b>3a</b> | -2120.1356233   | 11.10           |                      | <b>3a</b> | -2120.2308122      | 9.23            |                      |
| <b>3b</b> | -2120.1359798   | 10.88           |                      | <b>3b</b> | -2120.2313260      | 8.90            |                      |
| <b>4a</b> | -2120.1342780   | 11.95           |                      | <b>4a</b> | -2120.2329624      | 7.88            |                      |
| <b>4b</b> | -2120.1344654   | 11.83           |                      | <b>4b</b> | -2120.2324909      | 8.17            |                      |
| <b>5a</b> | -2120.1369060   | 10.30           |                      | <b>5a</b> | -2120.2323680      | 8.25            |                      |
| <b>5b</b> | -2120.1311791   | 13.89           |                      | <b>5b</b> | -2120.2337754      | 7.37            |                      |

<sup>a)</sup>in Hartrees; <sup>b)</sup>kcal\*<sup>-1</sup>; <sup>c)</sup>percentages; <sup>d)</sup>where not specified, Boltzmann population of conformer is less than 0.05%.

**Table SI 2.** Relative energies<sup>a)</sup>, experimental chemical shifts<sup>b)</sup> and calculated GIAO <sup>1</sup>H aliphatic chemical shifts<sup>c,d)</sup> at the DFT-B3LYP/6-31G(d) and the B3LYP/6-31++G(d,p) basis sets (shown in parentheses) with TMS<sup>e)</sup> used as the standard and chloroform used as the solvent (PCM) and experimental chemical shifts for the [(C<sub>2</sub>H<sub>5</sub>)<sub>3</sub>NH][TFSI] ion pair and its chloroform solvates.

| complex                                                                                                              | class of complex                     | ion pair of [(C <sub>2</sub> H <sub>5</sub> ) <sub>3</sub> NH][TFSI] |                    |                    |
|----------------------------------------------------------------------------------------------------------------------|--------------------------------------|----------------------------------------------------------------------|--------------------|--------------------|
|                                                                                                                      |                                      | relative energy                                                      | CH <sub>2</sub>    | CH <sub>3</sub>    |
| <b>1a</b>                                                                                                            | N <sup>+</sup> -H ... N <sup>-</sup> | 0.28 (0.72)                                                          | 3.12 (3.11)        | 1.37 (1.38)        |
| <b>1b</b>                                                                                                            |                                      | 0.24 (0.80)                                                          | 3.08 (3.08)        | 1.39 (1.43)        |
| <b>1c</b>                                                                                                            |                                      | 5.04 (4.76)                                                          | 3.38 (3.41)        | 1.46 (1.43)        |
| <b>2a</b>                                                                                                            | N <sup>+</sup> -H ... O(=S)          | 0.00 (0.32)                                                          | 3.07 (3.05)        | 1.38 (1.38)        |
| <b>2b</b>                                                                                                            |                                      | 0.39 (0.00)                                                          | 3.08 (3.05)        | 1.42 (1.40)        |
| <b>2c</b>                                                                                                            |                                      | 5.69 (4.85)                                                          | 3.37 (3.33)        | 1.48 (1.43)        |
| average                                                                                                              |                                      |                                                                      | <b>3.09 (3.06)</b> | <b>1.39 (1.40)</b> |
| solvates of the [(C <sub>2</sub> H <sub>5</sub> ) <sub>3</sub> NH][TFSI] ion pair<br>(6 CHCl <sub>3</sub> molecules) |                                      |                                                                      |                    |                    |
| <b>1a·6CHCl<sub>3</sub></b>                                                                                          | N <sup>+</sup> -H ... N <sup>-</sup> | 0.44 (0.90)                                                          | 3.18 (3.15)        | 1.44 (1.45)        |
| <b>1b·6CHCl<sub>3</sub></b>                                                                                          |                                      | 0.00 (0.81)                                                          | 3.17 (3.11)        | 1.42 (1.50)        |
| <b>1c·6CHCl<sub>3</sub></b>                                                                                          |                                      | 5.40 (4.80)                                                          | 3.46 (3.43)        | 1.52 (1.48)        |
| <b>2a·6CHCl<sub>3</sub></b>                                                                                          | N <sup>+</sup> -H ... O(=S)          | 0.11 (0.00)                                                          | 2.94 (3.04)        | 1.42 (1.43)        |
| <b>2b·6CHCl<sub>3</sub></b>                                                                                          |                                      | 0.11 (0.21)                                                          | 2.79 (3.07)        | 1.46 (1.47)        |
| <b>2c·6CHCl<sub>3</sub></b>                                                                                          |                                      | 5.66 (4.70)                                                          | 3.15 (3.33)        | 1.50 (1.42)        |
| average                                                                                                              |                                      |                                                                      | <b>3.01 (3.09)</b> | <b>1.43 (1.46)</b> |
| solvates of the [(C <sub>2</sub> H <sub>5</sub> ) <sub>3</sub> NH][TFSI] ion pair<br>(7 CHCl <sub>3</sub> molecules) |                                      |                                                                      |                    |                    |
| <b>1a·7CHCl<sub>3</sub></b>                                                                                          | N <sup>+</sup> -H ... N <sup>-</sup> | 0.43 (0.35)                                                          | 3.37 (3.33)        | 1.48 (1.48)        |
| <b>1b·7CHCl<sub>3</sub></b>                                                                                          |                                      | 0.09 (0.48)                                                          | 3.34 (3.26)        | 1.48 (1.49)        |
| <b>2a·7CHCl<sub>3</sub></b>                                                                                          | N <sup>+</sup> -H ... O(=S)          | 0.00 (0.00)                                                          | 3.30 (3.22)        | 1.46 (1.45)        |
| <b>2b·7CHCl<sub>3</sub></b>                                                                                          |                                      | 0.17 (0.02)                                                          | 3.34 (3.23)        | 1.51 (1.44)        |
| average                                                                                                              |                                      |                                                                      | <b>3.33 (3.25)</b> | <b>1.48 (1.46)</b> |
| exp.                                                                                                                 |                                      |                                                                      | <b>3.21 (q)</b>    | <b>1.34 (t)</b>    |

<sup>a)</sup>in kcal/mol, in chloroform; <sup>b)</sup>in CDCl<sub>3</sub>, room temperature; t-triplet, q-quartet; <sup>c)</sup>averages of the hydrogen atoms of the methylene (CH<sub>2</sub>) and methyl groups (CH<sub>3</sub>); <sup>d)</sup>Boltzmann's population-weighted average over all the relevant conformers;

<sup>e)</sup>calculated average chemical shifts (δ) of TMS protons in chloroform are 32.1733 (31.6433) respectively; <sup>f)</sup>see text and Figure 1 for complex labels.

**Table SI 3.** Relative energies<sup>a)</sup>, experimental chemical shifts<sup>b)</sup> and calculated GIAO <sup>1</sup>H aliphatic chemical shifts<sup>c,d)</sup> using the DFT-B3LYP/6-31G(d) and the B3LYP/6-31++G(d,p) basis sets (shown in parentheses) with TMS<sup>e)</sup> used as the standard and water used as the solvent (PCM) for the [(C<sub>2</sub>H<sub>5</sub>)<sub>3</sub>NH][TFSI] complexes and their hydrates.

| complex                                                                                                 | class of complex                         | ion pair of [(C <sub>2</sub> H <sub>5</sub> ) <sub>3</sub> NH][TFSI] |                    |                    |
|---------------------------------------------------------------------------------------------------------|------------------------------------------|----------------------------------------------------------------------|--------------------|--------------------|
|                                                                                                         |                                          | relative energy                                                      | CH <sub>2</sub>    | CH <sub>3</sub>    |
| <b>1a</b>                                                                                               | N <sup>+</sup> -H ... N <sup>-</sup>     | 0.62 (0.81)                                                          | 3.17 (3.16)        | 1.35 (1.36)        |
| <b>1b</b>                                                                                               |                                          | 0.48 (0.77)                                                          | 3.14 (3.13)        | 1.36 (1.40)        |
| <b>1c</b>                                                                                               |                                          | 5.84 (5.32)                                                          | 3.37 (3.38)        | 1.49 (1.46)        |
| <b>2a</b>                                                                                               | N <sup>+</sup> -H ... O(=S)              | 0.00 (0.35)                                                          | 3.13 (3.11)        | 1.45 (1.37)        |
| <b>2b</b>                                                                                               |                                          | 0.49 (0.00)                                                          | 3.16 (3.11)        | 1.45 (1.37)        |
| <b>2c</b>                                                                                               |                                          | 5.88 (5.20)                                                          | 3.36 (3.33)        | 1.65 (1.46)        |
| <b>3a</b>                                                                                               | C <sup>α</sup> -H ... N <sup>-</sup>     | 5.16 (2.28)                                                          | 3.20 (3.38)        | 1.35 (1.37)        |
| <b>3b</b>                                                                                               | C <sup>α</sup> -H ... O(=S)              | 4.65 (2.28)                                                          | 3.21 (3.44)        | 1.35 (1.37)        |
|                                                                                                         | N <sup>+</sup> -H ... OH <sub>2</sub>    |                                                                      |                    |                    |
| <b>4a</b>                                                                                               | C <sup>α</sup> -H ... O(=S)              | 4.05 (2.38)                                                          | 3.47 (3.38)        | 1.36 (1.35)        |
| <b>4b</b>                                                                                               | N <sup>+</sup> -H ... OH <sub>2</sub>    | 4.13 (2.20)                                                          | 3.43 (3.40)        | 1.37 (1.36)        |
| <b>5a</b>                                                                                               | C <sup>α</sup> -H ... F( <sub>3</sub> C) | 4.76 (3.05)                                                          | 3.20 (3.21)        | 1.35 (1.37)        |
| <b>5b</b>                                                                                               | N <sup>+</sup> -H ... OH <sub>2</sub>    | 4.72 (2.97)                                                          | 3.21 (3.21)        | 1.35 (1.37)        |
| average                                                                                                 |                                          |                                                                      | <b>3.14 (3.13)</b> | <b>1.42 (1.37)</b> |
| hydrate of the [(C <sub>2</sub> H <sub>5</sub> ) <sub>3</sub> NH][TFSI] ion pair<br>(6 water molecules) |                                          |                                                                      |                    |                    |
| <b>1a·6H<sub>2</sub>O</b> <sup>g,h)</sup>                                                               | N <sup>+</sup> -H ... N <sup>-</sup>     | 3.86 (2.10)                                                          | 3.27 (3.24)        | 1.34 (1.38)        |
| <b>1b·6H<sub>2</sub>O</b> <sup>g,h)</sup>                                                               |                                          | 6.78 (4.56)                                                          | 3.18 (3.10)        | 1.32 (1.37)        |
| <b>1c·6H<sub>2</sub>O</b> <sup>g,h)</sup>                                                               |                                          | 17.61 (14.07)                                                        | 3.52 (3.52)        | 1.51 (1.48)        |
| <b>2a·6H<sub>2</sub>O</b>                                                                               | N <sup>+</sup> -H ... O(=S)              | 1.18 (1.77)                                                          | 3.10 (3.07)        | 1.32 (1.37)        |
| <b>2b·6H<sub>2</sub>O</b> <sup>h)</sup>                                                                 |                                          | 12.35 (6.48)                                                         | 3.06 (3.10)        | 1.28 (1.36)        |
| <b>2c·6H<sub>2</sub>O</b> <sup>h)</sup>                                                                 |                                          | 2.88 (1.26)                                                          | 3.15 (3.19)        | 1.40 (1.45)        |
| <b>3a·6H<sub>2</sub>O</b> <sup>h)</sup>                                                                 | C <sup>α</sup> -H ... N <sup>-</sup>     | 12.32 (7.58)                                                         | 3.04 (3.51)        | 1.33 (1.36)        |
| <b>3b·6H<sub>2</sub>O</b> <sup>h)</sup>                                                                 | C <sup>α</sup> -H ... O(=S)              | 0.00 (0.00)                                                          | 3.16 (3.14)        | 1.33 (1.32)        |
|                                                                                                         | N <sup>+</sup> -H ... OH <sub>2</sub>    |                                                                      |                    |                    |
| <b>4a·6H<sub>2</sub>O</b> <sup>g,h)</sup>                                                               | C <sup>α</sup> -H ... O(=S)              | 5.04 (2.39)                                                          | 3.22 (3.18)        | 1.34 (1.33)        |
| <b>4b·6H<sub>2</sub>O</b> <sup>g,h)</sup>                                                               | N <sup>+</sup> -H ... OH <sub>2</sub>    | 5.47 (2.39)                                                          | 3.19 (3.20)        | 1.34 (1.33)        |
| <b>5a·6H<sub>2</sub>O</b> <sup>g,h)</sup>                                                               | C <sup>α</sup> -H ... F( <sub>3</sub> C) | 6.50 (2.39)                                                          | 2.99 (3.18)        | 1.29 (1.33)        |
| <b>5b·6H<sub>2</sub>O</b> <sup>h)</sup>                                                                 | N <sup>+</sup> -H ... OH <sub>2</sub>    | 6.43 (2.06)                                                          | 3.00 (3.18)        | 1.28 (1.31)        |
|                                                                                                         | N <sup>+</sup> -H ... N <sup>-</sup>     |                                                                      |                    |                    |
| average                                                                                                 |                                          |                                                                      | <b>3.15 (3.15)</b> | <b>1.33 (1.34)</b> |
| exp.                                                                                                    |                                          |                                                                      | <b>3.185 (q)</b>   | <b>1.27 (t)</b>    |

<sup>a)</sup>in kcal/mol, in water; <sup>b)</sup>in D<sub>2</sub>O, room temperature; t-triplet, q-quartet; <sup>c)</sup>averages of the hydrogen atoms of the methylene (CH<sub>2</sub>) and methyl groups (CH<sub>3</sub>); <sup>d)</sup>Boltzmann's population-weighted average over all relevant conformers; <sup>e)</sup>calculated average chemical shifts (δ) of TMS protons in water 32.1685 (31.6428); <sup>f)</sup>see text and Figure 1 for complex labels; <sup>g)</sup>C<sup>α</sup>-H ... F(<sub>3</sub>C) can also appear; <sup>h)</sup>the C<sup>α</sup>-H ... O(=S) feature can also appear.

**Table SI 4.** Comparison and assignment of the experimental proton chemical shifts<sup>a)</sup> of the (2-chloroethyl)diethylammonium bis(trifluoromethanesulfonyl) imide [(C<sub>2</sub>H<sub>5</sub>)<sub>2</sub>NH(C<sub>2</sub>H<sub>4</sub>Cl)][TFSI] neat and in dry CDCl<sub>3</sub>, wet CDCl<sub>3</sub>, and water.

| Proton group                                          | dry CDCl <sub>3</sub> | wet CDCl <sub>3</sub><br>(reflected peak) | water | neat | multi-<br>plicity <sup>b)</sup> |
|-------------------------------------------------------|-----------------------|-------------------------------------------|-------|------|---------------------------------|
| CH <sub>3</sub> (CH <sub>2</sub> N <sup>+</sup> )     | 1.40                  | 1.40 (1.33)                               | 1.31  | 1.22 | (t)                             |
| (CH <sub>3</sub> )CH <sub>2</sub> (N <sup>+</sup> )   | 3.35                  | 3.35 (3.28)                               | 3.30  | 3.21 | (q)                             |
| (ClCH <sub>2</sub> )CH <sub>2</sub> (N <sup>+</sup> ) | 3.54                  | 3.54 (3.47)                               | 3.56  | 3.40 | (t)                             |
| ClCH <sub>2</sub> (CH <sub>2</sub> N <sup>+</sup> )   | 3.88                  | 3.88 (3.82)                               | 3.935 | 3.78 | (t)                             |

<sup>a)</sup>δ, TMS as a reference, room temperature; <sup>b)</sup>t-triplet, q-quartet;

**Table SI 5.** Calculated chemical shifts<sup>a)</sup> of the [(C<sub>2</sub>H<sub>5</sub>)<sub>2</sub>NH(C<sub>2</sub>H<sub>4</sub>Cl)][TFSI] models.

| Proton group<br>/model                                | 1    | 2    | 3    | 4    | 5    | 6    | experimental<br>δ (wet CDCl <sub>3</sub> ) |
|-------------------------------------------------------|------|------|------|------|------|------|--------------------------------------------|
| CH <sub>3</sub> (CH <sub>2</sub> N <sup>+</sup> )     | 1.39 | 1.35 | 1.48 | 1.47 | 1.53 | 1.45 | 1.40 (1.33)                                |
| (CH <sub>3</sub> )CH <sub>2</sub> (N <sup>+</sup> )   | 3.48 | 3.57 | 3.18 | 3.38 | 3.18 | 3.11 | 3.35 (3.28)                                |
| (ClCH <sub>2</sub> )CH <sub>2</sub> (N <sup>+</sup> ) | 3.39 | 3.27 | 3.14 | 3.70 | 3.31 | 3.11 | 3.54 (3.47)                                |
| ClCH <sub>2</sub> (CH <sub>2</sub> N <sup>+</sup> )   | 3.86 | 3.65 | 4.08 | 3.78 | 3.64 | 3.71 | 3.88 (3.82)                                |

<sup>a)</sup>δ, TMS as a reference;

**Table SI 6.** Calculated chemical shifts<sup>a)</sup> of the [(C<sub>2</sub>H<sub>5</sub>)<sub>2</sub>NH(C<sub>2</sub>H<sub>4</sub>Cl)][TFSI] associates of model 2 with a water molecule or hydronium ions.

| Proton group<br>/model                                | 2(H <sub>5</sub> O <sub>3</sub> ) <sup>+</sup> | 2(H <sub>5</sub> O <sub>3</sub> ) <sup>+</sup> | 2(H <sub>2</sub> O) | 2(H <sub>2</sub> Oalt) | experimental<br>δ (wet CDCl <sub>3</sub> ) |
|-------------------------------------------------------|------------------------------------------------|------------------------------------------------|---------------------|------------------------|--------------------------------------------|
| CH <sub>3</sub> (CH <sub>2</sub> N <sup>+</sup> )     | 1.42                                           | 1.53                                           | 1.49                | 1.55                   | 1.40 (1.33)                                |
| (CH <sub>3</sub> )CH <sub>2</sub> (N <sup>+</sup> )   | 3.11                                           | 3.19                                           | 3.11                | 3.08                   | 3.35 (3.28)                                |
| (ClCH <sub>2</sub> )CH <sub>2</sub> (N <sup>+</sup> ) | 3.00                                           | 3.05                                           | 3.05                | 3.06                   | 3.54 (3.47)                                |
| ClCH <sub>2</sub> (CH <sub>2</sub> N <sup>+</sup> )   | 3.66                                           | 3.72                                           | 3.89                | 3.71                   | 3.88 (3.82)                                |

<sup>a)</sup>δ, TMS as a reference;

**Table SI 7.** Coordinates of the stable structures of  $[(C_2H_5)_3NH][TFSI]$ , its chloroform solvates and its hydrates as calculated at the DFT B3LYP/6-31++G(d,p) level of theory.

| $[(C_2H_5)_3NH][TFSI]$ ion pair <b>1a</b><br>B3LYP/6-31++(d,p) OPT<br>\HF=-2120.2452567\<br>1 -1.123783 -1.899443 2.065816<br>1 -1.672281 -0.287702 0.074991<br>6 -3.519122 0.623374 -0.341426<br>6 -3.495946 1.904463 0.483740<br>7 -2.688682 -0.521199 0.212449<br>6 -2.914422 -0.709115 1.698108<br>6 -2.186786 -1.898692 2.315369<br>6 -2.936499 -1.802444 -0.561627<br>6 -2.779314 -1.658797 -0.272005<br>1 -4.538917 0.236474 -0.439240<br>1 -3.117197 0.828407 -1.332488<br>1 -4.014169 2.675232 -0.094624<br>1 -4.013738 1.808108 1.441251<br>1 -2.476742 2.258612 0.647103<br>1 -2.576099 0.214603 2.168204<br>1 -3.997901 -0.786593 1.838106<br>1 -2.287578 -1.823301 3.402381<br>1 -2.611796 -2.857994 2.010800<br>1 -2.205451 -2.518856 -0.189818<br>1 -3.944093 -2.135903 -0.291929<br>1 -2.815111 -2.661244 -2.508252<br>1 -3.574056 -1.067750 -2.533108<br>1 -1.812814 -1.222975 -2.338516<br>8 1.447264 -1.583346 -1.936962<br>16 0.977175 -1.437215 -0.562176<br>7 0.166206 -0.050051 -0.242159<br>16 0.483390 1.395428 -0.955149<br>6 2.535712 -1.408073 0.507936<br>6 0.966348 2.425355 0.553606<br>8 0.160963 -2.497448 0.053505<br>8 1.631185 1.450525 -1.854109<br>8 -0.812218 1.970303 -1.351231<br>9 3.140296 -2.599577 0.417070<br>9 3.381086 -0.457219 0.102549<br>9 2.211980 -1.186194 1.792790<br>9 1.171174 3.693135 0.176543<br>9 -0.024474 2.409110 1.470768<br>9 2.079118 1.955295 1.126131 | $[(C_2H_5)_3NH][TFSI]$ ion pair <b>1b</b><br>B3LYP/6-31++(d,p) OPT<br>\HF=-2120.2452695\<br>1 2.706551 -1.631764 -2.961950<br>1 1.635743 -0.365552 -0.089794<br>6 3.269219 0.393338 -1.177965<br>6 3.521518 1.788658 -0.615744<br>7 2.652183 -0.606834 -0.216326<br>6 2.699908 -2.007760 -0.794817<br>6 2.105281 -2.124330 -2.193813<br>6 3.287400 -0.537616 1.158240<br>6 2.748055 -1.555353 2.157630<br>1 2.582990 0.451563 -0.202361<br>1 4.202826 -0.059890 -1.527185<br>1 3.808901 2.432896 -1.452461<br>1 2.629698 2.211065 -0.149630<br>1 4.340750 1.807049 0.107316<br>1 3.751731 -2.312426 -0.774128<br>1 2.126547 -2.634692 -0.115113<br>1 2.051718 -3.187452 -2.445426<br>1 1.083850 -1.737645 -2.219507<br>1 4.365703 -0.657178 1.009207<br>1 3.087831 0.469941 1.521527<br>1 3.172139 -1.315010 3.137126<br>1 1.660934 -1.498741 2.248784<br>1 3.029852 -2.583407 1.919381<br>8 -1.553554 -1.509955 1.946586<br>16 -1.052882 -1.408977 0.578632<br>7 -0.179319 -0.061206 0.251998<br>16 -0.432316 1.400681 0.954203<br>6 -2.587377 -1.322459 -0.521517<br>6 -0.834475 2.445693 -0.567945<br>8 -0.273854 -2.512670 -0.004657<br>8 -1.589521 1.522818 1.833891<br>8 0.885231 1.909970 1.371867<br>9 -3.249203 -2.482921 -0.428537<br>9 -3.394333 -0.327374 -0.144372<br>9 -2.229542 -1.132299 -1.802681<br>9 -0.986991 3.723553 -0.200319<br>9 0.173322 2.378160 -1.464119<br>9 -1.956392 2.025097 -1.160589 | $[(C_2H_5)_3NH][TFSI]$ ion pair <b>1c</b><br>B3LYP/6-31++(d,p) OPT<br>\HF=-2120.2388727\<br>1 4.129170 -2.608802 -0.175652<br>1 1.381313 -0.157334 -0.071395<br>6 2.845128 1.154840 -0.617587<br>6 4.234092 1.290890 -1.232283<br>7 2.432483 -0.225938 -0.142238<br>6 2.642435 -1.342540 -1.150596<br>6 3.982971 -2.068851 -1.114640<br>6 2.806934 -0.557091 1.293191<br>6 4.244743 -0.287352 1.271672<br>1 2.707423 1.817341 0.238356<br>1 2.089312 1.437372 -1.354599<br>1 4.371061 2.341825 -1.505654<br>1 5.039126 1.020591 -0.546895<br>1 4.340247 0.703504 -2.147842<br>1 1.830934 -2.047388 -0.958929<br>1 2.464986 -0.891223 -2.130619<br>1 3.972749 -2.816210 -1.914191<br>1 4.840001 -1.413969 -1.282668<br>1 2.125300 0.044371 1.899417<br>1 2.532742 -1.605384 1.431902<br>1 4.339843 -0.602356 2.765566<br>1 4.984246 -0.840790 1.140261<br>1 4.489633 0.777091 1.685346<br>8 -1.637314 -1.621193 1.949034<br>16 -1.042387 -1.508978 0.621764<br>7 -0.373314 -0.056289 0.263744<br>16 -0.817195 1.379545 0.927633<br>6 -2.472508 -1.713090 -0.594897<br>6 -1.354000 2.329645 -0.614795<br>8 -0.050691 -2.499260 0.168020<br>8 -1.979609 1.368481 1.808039<br>8 0.426361 2.059462 1.327711<br>9 -2.968219 -2.951752 -0.481499<br>9 -3.441198 -0.829037 -0.338093<br>9 -2.042090 -1.534441 -1.854750<br>9 -1.647384 3.589953 -0.274033<br>9 0.356800 2.355325 -1.524169<br>9 -2.427389 1.768757 -1.180359 | $[(C_2H_5)_3NH][TFSI]$ ion pair <b>2a</b><br>B3LYP/6-31++(d,p) OPT<br>\HF=-2120.2449119\<br>1 -2.318061 -2.211007 2.710372<br>1 -1.898520 -0.312097 -0.024584<br>6 -3.845627 -0.091505 -0.701783<br>6 -4.117367 1.383171 -0.422750<br>7 -2.817862 -0.742767 0.205972<br>6 -3.105190 -0.451420 1.665182<br>6 -2.167515 -1.130121 2.657908<br>6 -2.708579 -2.230937 -0.064271<br>6 -2.440650 -2.586324 -1.522537<br>1 -4.757448 -0.690520 -0.607485<br>1 -3.458360 -0.204551 -1.713652<br>1 -4.756100 1.759443 -1.227723<br>1 -4.647841 1.549418 0.518051<br>1 -3.191943 1.962817 -0.434048<br>1 -3.030799 0.630973 1.769767<br>1 -4.147249 -0.741881 1.836028<br>1 -1.119961 -0.931875 2.422480<br>1 -2.382203 -0.720213 3.649586<br>1 -1.880436 -2.581531 0.547800<br>1 -3.641887 -2.676718 0.295918<br>1 -2.240215 -3.660642 -1.571045<br>1 -3.288834 -2.380200 -2.179858<br>1 -1.550548 -2.080038 -1.904430<br>8 -0.981321 1.091047 -0.856378<br>16 0.426221 1.546908 -1.020637<br>7 1.501997 0.364737 -1.103442<br>16 1.246675 -1.138312 -0.562249<br>6 0.773978 2.439308 0.608263<br>6 2.844647 -1.403621 0.396682<br>8 0.707386 2.550756 -2.039431<br>8 0.171347 -1.274598 0.451545<br>8 1.275261 -2.125107 -1.644440<br>9 -0.064003 3.483869 0.730718<br>9 0.574014 1.617159 1.655367<br>9 2.031590 2.886618 0.647310<br>9 2.816366 -2.631731 0.939666<br>9 3.905655 -1.309960 -0.407706<br>9 2.958994 -0.502708 1.382504 | $[(C_2H_5)_3NH][TFSI]$ ion pair <b>2b</b><br>B3LYP/6-31++(d,p) OPT<br>\HF=-2120.245515\<br>1 -1.214428 -2.357301 -1.288489<br>1 -1.905388 -0.131150 -0.191864<br>6 -3.023651 -1.305487 1.140299<br>6 -2.855019 -0.507765 2.429290<br>7 -2.887905 -0.482993 -0.128115<br>6 -3.125531 -1.318537 -1.367516<br>6 -2.271474 -2.579311 -1.450901<br>6 -3.771495 0.746975 -0.098742<br>6 -3.693133 1.612308 -1.352641<br>1 -2.246845 -2.065080 1.082727<br>1 -4.006528 -1.786191 1.088019<br>1 -2.764146 -1.223139 3.251829<br>1 -1.944446 0.096980 2.417020<br>1 -3.709418 0.138140 2.647558<br>1 -4.195695 -1.551126 -1.386153<br>1 -2.900715 -0.668283 -2.212914<br>1 -2.578761 -3.347781 -0.738030<br>1 -2.384029 -2.996627 -2.456053<br>1 -4.791194 0.394462 0.088417<br>1 -3.441963 1.326517 0.763310<br>1 -4.226469 2.545894 -1.150185<br>1 -2.656521 1.863691 -1.591464<br>1 -4.164811 1.149118 -2.222816<br>8 0.059523 -1.701842 0.871776<br>16 1.465272 -1.242710 0.913750<br>7 1.627804 0.361331 0.792688<br>16 0.390971 1.316315 0.436176<br>6 2.197490 -1.859570 -0.712944<br>6 1.358224 2.743240 -0.320346<br>8 2.365077 -1.765674 1.934727<br>8 -0.494791 0.847377 -0.672612<br>8 -0.317141 1.873395 1.599245<br>9 2.144780 -3.202111 -0.741461<br>9 1.495234 -1.387695 -1.758783<br>9 3.470467 -1.474182 -0.841047<br>9 0.476723 3.686405 -0.695495<br>9 2.204217 3.270179 0.565834<br>9 2.743286 2.337254 -1.397472 | $[(C_2H_5)_3NH][TFSI]$ ion pair <b>2c</b><br>B3LYP/6-31++(d,p) OPT<br>\HF=-2120.2373401\<br>1 -4.909903 -1.605068 -0.542605<br>1 -1.601277 0.364740 -0.289933<br>6 -2.820095 0.155781 1.327833<br>6 -4.069955 -0.537125 1.858049<br>7 -2.622968 0.164952 -0.181213<br>6 -2.778302 -1.179466 -0.870679<br>6 -4.175646 -1.557480 -1.348627<br>6 -3.241243 1.344725 -0.907695<br>6 -4.691216 1.685298 -0.582801<br>1 -2.775399 1.202921 1.568133<br>1 -1.930414 -0.339633 1.718858<br>1 -4.062404 -0.431907 2.947425<br>1 -5.003104 -0.106091 1.490264<br>1 -4.064512 -1.608603 1.642322<br>1 -2.094338 -1.137644 -1.722843<br>1 -2.967627 -1.913266 -0.175896<br>1 -4.546754 -0.881347 -2.123628<br>1 -4.111508 -2.554375 -1.795874<br>1 -2.595339 2.192062 -0.665009<br>1 -3.110088 1.139260 -1.973242<br>1 -4.978155 2.538919 -1.204930<br>1 -5.385182 0.870680 -0.796877<br>1 -4.816558 1.990203 0.459074<br>8 -0.168539 -1.565386 0.907541<br>16 1.308643 -1.459655 0.915713<br>7 1.851009 0.054355 0.756282<br>16 0.870501 1.272183 0.397822<br>6 1.830396 -2.267899 -0.708169<br>6 2.153673 2.443443 -0.326663<br>8 2.075245 -2.168379 1.933141<br>8 -0.074808 0.1025619 -0.735916<br>8 0.281816 1.964135 1.553461<br>9 1.475606 -3.563842 -0.691927<br>9 1.221809 -1.676324 -1.750975<br>9 3.153207 -2.183982 -0.878303<br>9 1.519408 3.565808 -0.704355<br>9 3.079467 2.754049 0.581868<br>9 2.743234 1.901177 -1.396154 |
|-----------------------------------------------------------------------------------------------------------------------------------------------------------------------------------------------------------------------------------------------------------------------------------------------------------------------------------------------------------------------------------------------------------------------------------------------------------------------------------------------------------------------------------------------------------------------------------------------------------------------------------------------------------------------------------------------------------------------------------------------------------------------------------------------------------------------------------------------------------------------------------------------------------------------------------------------------------------------------------------------------------------------------------------------------------------------------------------------------------------------------------------------------------------------------------------------------------------------------------------------------------------------------------------------------------------------------------------------------------------------------------------------------------------------------|-------------------------------------------------------------------------------------------------------------------------------------------------------------------------------------------------------------------------------------------------------------------------------------------------------------------------------------------------------------------------------------------------------------------------------------------------------------------------------------------------------------------------------------------------------------------------------------------------------------------------------------------------------------------------------------------------------------------------------------------------------------------------------------------------------------------------------------------------------------------------------------------------------------------------------------------------------------------------------------------------------------------------------------------------------------------------------------------------------------------------------------------------------------------------------------------------------------------------------------------------------------------------------------------------------------------------------------------------------------------------------------------------------------------------|----------------------------------------------------------------------------------------------------------------------------------------------------------------------------------------------------------------------------------------------------------------------------------------------------------------------------------------------------------------------------------------------------------------------------------------------------------------------------------------------------------------------------------------------------------------------------------------------------------------------------------------------------------------------------------------------------------------------------------------------------------------------------------------------------------------------------------------------------------------------------------------------------------------------------------------------------------------------------------------------------------------------------------------------------------------------------------------------------------------------------------------------------------------------------------------------------------------------------------------------------------------------------------------------------------------------------------------------------------------------------------------------------------------------|---------------------------------------------------------------------------------------------------------------------------------------------------------------------------------------------------------------------------------------------------------------------------------------------------------------------------------------------------------------------------------------------------------------------------------------------------------------------------------------------------------------------------------------------------------------------------------------------------------------------------------------------------------------------------------------------------------------------------------------------------------------------------------------------------------------------------------------------------------------------------------------------------------------------------------------------------------------------------------------------------------------------------------------------------------------------------------------------------------------------------------------------------------------------------------------------------------------------------------------------------------------------------------------------------------------------------------------------------------------------------------------------------------------------------------|-------------------------------------------------------------------------------------------------------------------------------------------------------------------------------------------------------------------------------------------------------------------------------------------------------------------------------------------------------------------------------------------------------------------------------------------------------------------------------------------------------------------------------------------------------------------------------------------------------------------------------------------------------------------------------------------------------------------------------------------------------------------------------------------------------------------------------------------------------------------------------------------------------------------------------------------------------------------------------------------------------------------------------------------------------------------------------------------------------------------------------------------------------------------------------------------------------------------------------------------------------------------------------------------------------------------------------------------------------------------------------------------------------------------------------|--------------------------------------------------------------------------------------------------------------------------------------------------------------------------------------------------------------------------------------------------------------------------------------------------------------------------------------------------------------------------------------------------------------------------------------------------------------------------------------------------------------------------------------------------------------------------------------------------------------------------------------------------------------------------------------------------------------------------------------------------------------------------------------------------------------------------------------------------------------------------------------------------------------------------------------------------------------------------------------------------------------------------------------------------------------------------------------------------------------------------------------------------------------------------------------------------------------------------------------------------------------------------------------------------------------------------------------------------------------------------------------------------------------------------------|
| $[(C_2H_5)_3NH][TFSI]$ ion pair <b>3a</b><br>B3LYP/6-31++(d,p) OPT<br>\HF=-2120.2308122\<br>1 -4.937360 1.922883 -0.662943<br>1 -4.234405 -0.072610 0.584106<br>6 -2.400953 -0.418877 1.488856<br>6 -2.849576 0.391458 2.696716<br>7 -3.264602 -0.152996 0.261294<br>6 -2.903638 1.167956 -0.403817<br>6 -4.036946 1.720941 -1.255770<br>6 -3.213610 -1.317404 -0.718733<br>6 -4.128155 -2.460341 -0.298323                                                                                                                                                                                                                                                                                                                                                                                                                                                                                                                                                                                                                                                                                                                                                                                                                                                                                                                                                                                                                 | $[(C_2H_5)_3NH][TFSI]$ ion pair <b>3b</b><br>B3LYP/6-31++(d,p) OPT<br>\HF=-2120.231326\<br>1 4.096579 -2.823349 0.582487<br>1 4.303043 0.005463 -0.205730<br>6 2.886787 -0.216857 1.285965<br>6 3.576129 0.869828 2.097166<br>7 3.296469 -0.187648 -0.181245<br>6 3.077854 -1.529389 -0.864954<br>6 4.127944 -2.562700 -0.478652<br>6 2.604811 0.938103 -0.941224<br>6 3.424652 1.411733 -2.132578                                                                                                                                                                                                                                                                                                                                                                                                                                                                                                                                                                                                                                                                                                                                                                                                                                                                                                                                                                                                                      | $[(C_2H_5)_3NH][TFSI]$ ion pair <b>4a</b><br>B3LYP/6-31++(d,p) OPT<br>\HF=-2120.2329624\<br>1 -5.118442 0.860346 -1.586127<br>1 -4.227258 -1.191261 0.299253<br>6 -2.384879 -0.967456 1.221941<br>6 -3.066663 -1.196293 2.562302<br>7 -3.385260 -0.635381 0.117454<br>6 -3.794728 0.827198 0.162473<br>6 -5.133900 1.084528 -0.516256<br>6 -2.875543 -1.046326 -1.259565<br>6 -2.991124 -2.545852 -1.489149                                                                                                                                                                                                                                                                                                                                                                                                                                                                                                                                                                                                                                                                                                                                                                                                                                                                                                                                                                                                          | $[(C_2H_5)_3NH][TFSI]$ ion pair <b>4b</b><br>B3LYP/6-31++(d,p) OPT<br>\HF=-2120.2324909\<br>1 4.357738 -2.396448 1.856953<br>1 4.236959 -1.235860 -0.261405<br>6 3.908379 0.795271 -0.034717<br>6 5.012776 1.109631 -1.036069<br>7 3.414646 -0.638416 -0.127917<br>6 2.756598 -1.077865 1.178124<br>6 3.788130 -1.525811 2.203701<br>6 2.518539 -0.852175 -1.343258<br>6 2.373171 -2.321835 -1.707663                                                                                                                                                                                                                                                                                                                                                                                                                                                                                                                                                                                                                                                                                                                                                                                                                                                                                                                                                                                                                           | $[(C_2H_5)_3NH][TFSI]$ ion pair <b>5a</b><br>B3LYP/6-31++(d,p) OPT<br>\HF=-2120.232368\<br>1 4.030471 -0.099652 2.719033<br>1 4.107584 -0.324735 0.290137<br>6 3.062989 0.711227 -1.169743<br>6 4.077360 1.846502 -1.137831<br>7 3.118302 -0.167093 0.072084<br>6 2.499721 0.516813 1.284816<br>6 2.940242 -0.115650 2.596868<br>6 2.496629 -1.532204 -0.200414<br>6 3.478132 -2.477370 -0.878328                                                                                                                                                                                                                                                                                                                                                                                                                                                                                                                                                                                                                                                                                                                                                                                                                                                                                                                                                                                                                             | $[(C_2H_5)_3NH][TFSI]$ ion pair <b>5b</b><br>B3LYP/6-31++(d,p) OPT<br>\HF=-2120.2337754\<br>1 3.584866 -0.510644 2.896034<br>1 4.281319 -0.803028 0.199901<br>6 3.437880 1.080810 0.367393<br>6 4.715768 1.692461 -0.191389<br>7 3.339602 -0.412709 0.091214<br>6 2.450979 -1.109991 1.117587<br>6 3.211249 -1.412619 2.401313<br>6 2.910257 -0.691732 -1.344756<br>6 3.262617 -2.103863 -1.789846                                                                                                                                                                                                                                                                                                                                                                                                                                                                                                                                                                                                                                                                                                                                                                                                                                                                                                                                                                                                                             |

|                                                                                                                                                                                                                                                                                                                                                                                                                                                                                                                                                                                                                                                                                                                                                                                                                                                                                                                                                                                                                                                                            |                                                                                                                                                                                                                                                                                                                                                                                                                                                                                                                                                                                                                                                                                                                                                                                                                                                                                                                                                                                                                                                                            |                                                                                                                                                                                                                                                                                                                                                                                                                                                                                                                                                                                                                                                                                                                                                                                                                                                                                                                                                                                                                                                                              |                                                                                                                                                                                                                                                                                                                                                                                                                                                                                                                                                                                                                                                                                                                                                                                                                                                                                                                                                                                                                                                                               |                                                                                                                                                                                                                                                                                                                                                                                                                                                                                                                                                                                                                                                                                                                                                                                                                                                                                                                                                                                                                                                                            |                                                                                                                                                                                                                                                                                                                                                                                                                                                                                                                                                                                                                                                                                                                                                                                                                                                                                                                                                                                                                                                                          |
|----------------------------------------------------------------------------------------------------------------------------------------------------------------------------------------------------------------------------------------------------------------------------------------------------------------------------------------------------------------------------------------------------------------------------------------------------------------------------------------------------------------------------------------------------------------------------------------------------------------------------------------------------------------------------------------------------------------------------------------------------------------------------------------------------------------------------------------------------------------------------------------------------------------------------------------------------------------------------------------------------------------------------------------------------------------------------|----------------------------------------------------------------------------------------------------------------------------------------------------------------------------------------------------------------------------------------------------------------------------------------------------------------------------------------------------------------------------------------------------------------------------------------------------------------------------------------------------------------------------------------------------------------------------------------------------------------------------------------------------------------------------------------------------------------------------------------------------------------------------------------------------------------------------------------------------------------------------------------------------------------------------------------------------------------------------------------------------------------------------------------------------------------------------|------------------------------------------------------------------------------------------------------------------------------------------------------------------------------------------------------------------------------------------------------------------------------------------------------------------------------------------------------------------------------------------------------------------------------------------------------------------------------------------------------------------------------------------------------------------------------------------------------------------------------------------------------------------------------------------------------------------------------------------------------------------------------------------------------------------------------------------------------------------------------------------------------------------------------------------------------------------------------------------------------------------------------------------------------------------------------|-------------------------------------------------------------------------------------------------------------------------------------------------------------------------------------------------------------------------------------------------------------------------------------------------------------------------------------------------------------------------------------------------------------------------------------------------------------------------------------------------------------------------------------------------------------------------------------------------------------------------------------------------------------------------------------------------------------------------------------------------------------------------------------------------------------------------------------------------------------------------------------------------------------------------------------------------------------------------------------------------------------------------------------------------------------------------------|----------------------------------------------------------------------------------------------------------------------------------------------------------------------------------------------------------------------------------------------------------------------------------------------------------------------------------------------------------------------------------------------------------------------------------------------------------------------------------------------------------------------------------------------------------------------------------------------------------------------------------------------------------------------------------------------------------------------------------------------------------------------------------------------------------------------------------------------------------------------------------------------------------------------------------------------------------------------------------------------------------------------------------------------------------------------------|--------------------------------------------------------------------------------------------------------------------------------------------------------------------------------------------------------------------------------------------------------------------------------------------------------------------------------------------------------------------------------------------------------------------------------------------------------------------------------------------------------------------------------------------------------------------------------------------------------------------------------------------------------------------------------------------------------------------------------------------------------------------------------------------------------------------------------------------------------------------------------------------------------------------------------------------------------------------------------------------------------------------------------------------------------------------------|
| <p>1 -1.376524 -0.201392 1.179257<br/> 1 -2.468826 -1.488037 1.691493<br/> 1 -2.207642 0.131682 3.543149<br/> 1 -2.757075 1.470069 2.543606<br/> 1 -3.882636 0.162308 2.985594<br/> 1 -2.655495 1.863842 0.398080<br/> 1 -1.990334 0.995101 -0.973756<br/> 1 -3.705149 2.669032 -1.687609<br/> 1 -4.305326 1.064434 -2.088328<br/> 1 -3.511847 -0.922948 -1.690891<br/> 1 -2.168102 -1.630292 -0.763741<br/> 1 -4.049892 -3.257956 -1.042181<br/> 1 -3.842649 -2.892202 0.664961<br/> 1 -5.179709 -2.152083 -0.252159<br/> 8 1.429406 -1.727930 -2.006256<br/> 16 0.871621 -1.510849 -0.672948<br/> 7 0.384617 -0.002639 -0.337637<br/> 16 1.020778 1.358867 -0.975098<br/> 6 2.282244 -1.881459 0.528415<br/> 6 1.393410 2.287346 0.626355<br/> 8 -0.214652 -2.387109 -0.188885<br/> 8 2.301751 1.240391 -1.667335<br/> 8 -0.070898 2.148250 -1.570574<br/> 9 2.652417 -3.163361 0.396313<br/> 9 3.336684 -1.096731 0.286300<br/> 9 1.879056 -1.682930 1.797314<br/> 9 1.872246 3.504349 0.336956<br/> 9 0.269063 2.441322 1.362908<br/> 9 2.294196 1.634326 1.370953</p> | <p>1 3.144204 -1.208019 1.660864<br/> 1 1.802932 -0.105121 1.291785<br/> 1 3.264924 0.767981 3.140369<br/> 1 4.668853 0.777060 2.065454<br/> 1 3.285859 1.873735 1.778648<br/> 1 2.063078 -1.844871 -0.605870<br/> 1 3.115231 -1.335025 -1.938545<br/> 1 3.929508 -3.480332 -1.039404<br/> 1 5.143229 -2.233895 -0.731973<br/> 1 1.624393 0.548374 -1.217549<br/> 1 2.434535 1.746139 -0.230514<br/> 1 2.876761 2.215428 -2.632290<br/> 1 4.394504 1.819894 -1.823756<br/> 1 3.596049 0.625669 -2.874414<br/> 8 -1.311014 -1.763834 1.905709<br/> 16 -0.901231 -1.545609 0.518685<br/> 7 -0.377794 -0.052709 0.162523<br/> 16 -0.838616 1.321670 0.906730<br/> 6 -2.461439 -1.807027 -0.513179<br/> 6 -1.413849 2.320558 -0.589002<br/> 8 0.074592 -2.463663 -0.099326<br/> 8 -1.991189 1.257905 1.802295<br/> 8 0.383309 2.032841 1.330415<br/> 9 -2.887823 -3.068970 -0.360141<br/> 9 -3.430841 -0.970656 -0.126654<br/> 9 -2.203100 -1.597319 -1.815127<br/> 9 -1.747682 3.556899 -0.194200<br/> 9 -0.425896 2.423577 -1.504955<br/> 9 -2.473522 1.752568 -1.175493</p> | <p>1 -1.673137 -0.142669 1.241369<br/> 1 -1.837408 -1.851799 0.900354<br/> 1 -2.293812 -1.429291 3.299796<br/> 1 -3.607916 -0.316804 2.924917<br/> 1 -3.758914 -2.046364 2.530387<br/> 1 -3.845949 1.100335 1.217894<br/> 1 -2.970053 1.380041 -0.290749<br/> 1 -5.945390 0.513522 -0.049544<br/> 1 -5.378439 2.145405 -0.411925<br/> 1 -3.472718 -0.494885 -1.987420<br/> 1 -1.843172 -0.702308 -1.312877<br/> 1 -2.646771 -2.763711 -2.503817<br/> 1 -2.354073 -3.118369 -0.811440<br/> 1 -4.027069 -2.897841 -1.406577<br/> 8 -0.733064 1.279300 -0.488219<br/> 16 0.686150 1.520345 -0.858443<br/> 7 1.634188 0.236077 -0.693863<br/> 16 1.152755 -1.088968 0.101382<br/> 6 1.289135 2.713891 0.473713<br/> 6 2.790258 -2.013827 -0.011131<br/> 8 0.975455 2.211285 -2.112290<br/> 8 0.882907 -0.918876 1.540710<br/> 8 0.182676 -1.917368 -0.649181<br/> 9 0.603122 3.867704 0.375829<br/> 9 1.088822 2.205252 1.698294<br/> 9 2.591872 2.975428 0.321411<br/> 9 2.628466 -3.202619 0.596226<br/> 9 3.143986 -2.227537 -1.281932<br/> 9 3.763297 -1.342801 0.612417</p> | <p>1 4.273307 0.930002 0.985124<br/> 1 3.023156 1.421324 -0.160218<br/> 1 5.342435 2.140340 -0.877372<br/> 1 5.886118 0.461421 -0.896949<br/> 1 4.681452 1.032323 -2.074783<br/> 1 2.162558 -0.225589 1.508489<br/> 1 2.055547 -1.875428 0.938511<br/> 1 4.492043 -0.733520 2.478504<br/> 1 3.262517 -1.823077 3.115371<br/> 1 1.560449 -0.389910 -1.107585<br/> 1 2.980879 -0.297095 -2.161364<br/> 1 1.764022 -2.383877 -2.613090<br/> 1 3.341742 -2.792357 -1.918801<br/> 1 1.847228 -2.891321 -0.938461<br/> 8 0.768619 1.278051 0.428116<br/> 16 -0.634473 1.511568 0.859777<br/> 7 -1.575658 0.214784 0.773678<br/> 16 -1.147262 -1.117671 -0.039649<br/> 6 -1.313841 2.675155 -0.462704<br/> 6 -2.844858 -1.933973 -0.037961<br/> 8 -0.868177 2.223751 2.113637<br/> 8 -0.792741 -0.923520 -1.458452<br/> 8 -0.276498 -2.030917 0.730424<br/> 9 -0.631270 3.834363 -0.423314<br/> 9 -1.177134 2.144291 -1.685811<br/> 9 -2.608473 2.932379 -0.244778<br/> 9 -2.729130 -3.119644 -0.661233<br/> 9 -3.283911 -2.145070 1.206195<br/> 9 -3.734117 -1.187114 -0.700149</p> | <p>1 2.032821 1.068873 -1.251892<br/> 1 3.261295 0.052003 -2.017059<br/> 1 4.007751 2.393740 -2.082069<br/> 1 3.886899 2.565012 -0.336639<br/> 1 5.106114 1.477684 -1.045190<br/> 1 2.807447 1.562248 1.237520<br/> 1 1.420900 0.458600 1.131308<br/> 1 2.509286 0.465960 3.416618<br/> 1 2.577501 -1.139800 2.711278<br/> 1 2.154898 -1.930179 0.753927<br/> 1 1.606414 -1.337477 -0.797812<br/> 1 2.973964 -3.431106 -1.057028<br/> 1 3.826760 -2.107721 -1.847748<br/> 1 4.350555 -2.681616 -0.246162<br/> 8 -2.558906 -0.699314 1.354677<br/> 16 -1.257860 -1.094822 0.819811<br/> 7 -0.445373 0.019013 -0.047712<br/> 16 -1.102280 1.238024 -0.903549<br/> 6 -1.630022 -2.467939 -0.427649<br/> 6 -1.331706 2.626220 0.362219<br/> 8 -0.249321 -1.711092 1.700470<br/> 8 -0.011179 1.751143 -1.752091<br/> 8 -2.428927 1.008373 -1.470832<br/> 9 -2.163220 -3.516945 0.213565<br/> 9 -2.474855 -2.058719 -1.374731<br/> 9 -0.486445 -2.878245 -1.025875<br/> 9 -1.718793 3.742565 -0.269991<br/> 9 -2.240338 2.310333 1.286228<br/> 9 -0.158829 2.880456 0.987868</p> | <p>1 3.397505 1.199440 1.451211<br/> 1 2.534097 1.521857 -0.058864<br/> 1 4.732749 2.755641 0.064415<br/> 1 5.613304 1.235719 0.242954<br/> 1 4.778347 1.622163 -1.280770<br/> 1 1.595924 -0.451404 1.282159<br/> 1 2.079577 -2.021485 0.652366<br/> 1 2.528809 -1.903969 3.100304<br/> 1 4.053288 -2.094269 2.229815<br/> 1 1.839725 -0.503329 -1.387348<br/> 1 3.423003 0.047353 -1.963783<br/> 1 2.976081 -2.211216 -2.839655<br/> 1 4.338429 -2.307163 -1.717243<br/> 1 2.712190 -2.866023 -1.233510<br/> 8 -0.040884 -1.664957 -0.807463<br/> 16 -1.464128 -1.261479 -0.885775<br/> 7 -1.719368 0.309894 -0.622951<br/> 16 -0.557877 1.274428 -0.064243<br/> 6 -2.241823 -2.086604 0.623248<br/> 6 -1.605344 2.832750 0.077611<br/> 8 -2.279320 -1.723212 -2.004948<br/> 8 -0.076861 0.996932 1.307079<br/> 8 0.501639 1.599572 -1.047338<br/> 9 -2.145284 -3.421864 0.494233<br/> 9 -1.601746 -1.724390 1.747592<br/> 9 -3.533138 -1.758611 0.738679<br/> 9 -0.802249 3.820828 0.513914<br/> 9 -2.116346 3.187170 -1.103792<br/> 9 -2.596310 2.666744 0.958135</p> |
| <p>[(C<sub>2</sub>H<sub>5</sub>)<sub>3</sub>NH][TFSI] solvate <b>1a-7CHCl3</b><br/> B3LYP/6-31++(d,p) OPT<br/> SCRF=(PCM,Solvent=CHLOROFORM)<br/> \HF=-12055.2942499\<br/> 1 -2.939651 1.043744 -2.658412<br/> 1 -2.756831 -0.648107 -0.725891<br/> 6 -3.897346 -2.363279 -0.375741<br/> 6 -3.180022 -3.418909 -1.207718<br/> 7 -3.743188 -0.935073 -0.874508<br/> 6 -4.024674 -0.823699 -2.361639<br/> 6 -3.897519 0.588270 -2.921512<br/> 6 -4.604462 0.024214 -0.069603<br/> 6 -4.399092 -0.066009 1.437596<br/> 1 -4.973037 -2.553770 -0.336480<br/> 1 -3.507306 -2.367008 0.641146<br/> 1 -3.246240 -4.364355 -0.661617<br/> 1 -3.637867 -3.574247 -2.186741<br/> 1 -2.119873 -3.187962 -1.332257<br/> 1 -3.307503 -1.480765 -2.852081<br/> 1 -5.027947 -1.230051 -2.516451<br/> 1 -3.949871 0.518697 -4.011759<br/> 1 -4.702554 1.249590 -2.594965<br/> 1 -4.343582 1.022677 -0.415782<br/> 1 -5.639965 -0.188919 -0.348487<br/> 1 -4.937984 0.767852 1.895836</p>                                                                                                   | <p>[(C<sub>2</sub>H<sub>5</sub>)<sub>3</sub>NH][TFSI] solvate <b>1b-7CHCl3</b><br/> B3LYP/6-31++(d,p) OPT<br/> SCRF=(PCM,Solvent=CHLOROFORM)<br/> \HF=-12055.294052\<br/> 8 -0.298512 2.226946 1.704841<br/> 16 -0.770792 2.000385 0.336696<br/> 7 -0.785465 0.447869 -0.154373<br/> 16 0.289320 -0.672443 0.345241<br/> 6 0.472431 2.910426 -0.762153<br/> 6 1.115781 -1.144269 -1.287505<br/> 8 -2.066656 2.557834 -0.082067<br/> 8 1.376645 -0.188231 1.207851<br/> 8 -0.443711 -1.888010 0.728418<br/> 9 0.384200 4.221547 -0.512054<br/> 9 1.721585 2.499665 -0.505952<br/> 9 0.198523 2.693542 -2.05332<br/> 9 2.017448 -2.104642 -1.051740<br/> 9 0.203989 -1.605834 -2.155369<br/> 9 1.732322 -0.087383 -1.827693<br/> 17 0.985419 2.554349 5.165212<br/> 6 0.717842 0.924114 4.476795<br/> 17 -0.906572 0.302378 4.912767<br/> 17 1.997469 -0.211543 5.001422<br/> 1 0.757427 1.007351 3.394572<br/> 17 4.541437 -4.895007 -2.222183</p>                                                                                                                          | <p>[(C<sub>2</sub>H<sub>5</sub>)<sub>3</sub>NH][TFSI] solvate <b>2a-7CHCl3</b><br/> B3LYP/6-31++(d,p) OPT<br/> SCRF=(PCM, Solvent=CHLOROFORM)<br/> \HF=-12055.2948091\<br/> 17 -8.700336 -1.454506 0.111338<br/> 6 -9.033197 -1.949087 -1.576882<br/> 17 -8.166703 -3.460558 -1.987729<br/> 17 -8.624457 -0.639315 -2.724619<br/> 1 -10.097536 -2.144484 -1.660290<br/> 1 -4.452752 0.483683 -3.175746<br/> 1 -2.902284 -0.989180 -0.623565<br/> 6 -4.326385 -2.291809 0.119533<br/> 6 -3.679375 -3.627003 -0.229589<br/> 7 -3.913060 -1.137484 -0.778246<br/> 6 -4.123967 -1.472960 -2.243786<br/> 6 -3.751300 -0.357237 -3.214790<br/> 6 -4.614177 0.151629 -0.388239<br/> 6 -4.432790 0.538333 1.074751<br/> 1 -5.416959 -2.345092 0.065169<br/> 1 -4.043358 -2.000671 1.130048<br/> 1 -3.917997 -4.329935 0.573573<br/> 1 -4.056101 -4.054211 -1.161239<br/> 1 -2.590653 -3.543129 -0.282490<br/> 1 -3.509570 -2.350910 -2.440721<br/> 1 -5.174509 -1.759697 -2.340730</p>                                                                                               | <p>[(C<sub>2</sub>H<sub>5</sub>)<sub>3</sub>NH][TFSI] solvate <b>2b-7CHCl3</b><br/> B3LYP/6-31++(d,p) OPT<br/> SCRF=(PCM, Solvent=CHLOROFORM)<br/> \HF=-12055.2947772\<br/> 1 -1.986959 -2.352603 -2.350868<br/> 1 -3.110480 -0.322864 -1.206583<br/> 6 -4.255670 -1.665264 -0.108282<br/> 6 -4.270974 -0.921087 1.221108<br/> 7 -4.035107 -0.773081 -1.316605<br/> 6 -4.004269 -1.572560 -2.606561<br/> 6 -2.984222 -2.704348 -2.625641<br/> 6 -5.066014 0.341395 -1.378785<br/> 6 -4.927549 1.266278 -2.582410<br/> 1 -3.438150 -2.382774 -0.113962<br/> 1 -5.195662 -2.194093 -0.286835<br/> 1 -4.260481 -1.668713 2.019129<br/> 1 -3.378876 -0.301143 1.344353<br/> 1 -5.161478 -0.304559 1.359188<br/> 1 -5.021609 -1.942293 -2.760183<br/> 1 -3.774669 -0.858494 -3.396390<br/> 1 -3.256947 -3.536439 -1.973300<br/> 1 -2.936721 -3.089691 -3.648223<br/> 1 -6.043729 -0.147808 -1.356020<br/> 1 -4.944752 0.913293 -0.459688<br/> 1 -5.600811 2.113950 -2.426898</p>                                                                                                   |                                                                                                                                                                                                                                                                                                                                                                                                                                                                                                                                                                                                                                                                                                                                                                                                                                                                                                                                                                                                                                                                            |                                                                                                                                                                                                                                                                                                                                                                                                                                                                                                                                                                                                                                                                                                                                                                                                                                                                                                                                                                                                                                                                          |

|                                                                                                                                                                                                                                                                                                                                                                                                                                                                                                                                                                                                                                                                                                                                                                                                                                                                                                                                                                                                                                                                                                                                                                                                                                                                                                                                                                                                                                                                                                                                                                                                                                                                                                                                                                                                                                    |                                                                                                                                                                                                                                                                                                                                                                                                                                                                                                                                                                                                                                                                                                                                                                                                                                                                                                                                                                                                                                                                                                                                                                                                                                                                                                                                                                                                                                                                                                                                                                                                                                                                                                                                                                                                                                                      |                                                                                                                                                                                                                                                                                                                                                                                                                                                                                                                                                                                                                                                                                                                                                                                                                                                                                                                                                                                                                                                                                                                                                                                                                                                                                                                                                                                                                                                                                                                                                                                                                                                                                                                                                                                                                      |                                                                                                                                                                                                                                                                                                                                                                                                                                                                                                                                                                                                                                                                                                                                                                                                                                                                                                                                                                                                                                                                                                                                                                                                                                                                                                                                                                                                                                                                                                                                                                                                                                                                                                                                                                                                                                   |
|------------------------------------------------------------------------------------------------------------------------------------------------------------------------------------------------------------------------------------------------------------------------------------------------------------------------------------------------------------------------------------------------------------------------------------------------------------------------------------------------------------------------------------------------------------------------------------------------------------------------------------------------------------------------------------------------------------------------------------------------------------------------------------------------------------------------------------------------------------------------------------------------------------------------------------------------------------------------------------------------------------------------------------------------------------------------------------------------------------------------------------------------------------------------------------------------------------------------------------------------------------------------------------------------------------------------------------------------------------------------------------------------------------------------------------------------------------------------------------------------------------------------------------------------------------------------------------------------------------------------------------------------------------------------------------------------------------------------------------------------------------------------------------------------------------------------------------|------------------------------------------------------------------------------------------------------------------------------------------------------------------------------------------------------------------------------------------------------------------------------------------------------------------------------------------------------------------------------------------------------------------------------------------------------------------------------------------------------------------------------------------------------------------------------------------------------------------------------------------------------------------------------------------------------------------------------------------------------------------------------------------------------------------------------------------------------------------------------------------------------------------------------------------------------------------------------------------------------------------------------------------------------------------------------------------------------------------------------------------------------------------------------------------------------------------------------------------------------------------------------------------------------------------------------------------------------------------------------------------------------------------------------------------------------------------------------------------------------------------------------------------------------------------------------------------------------------------------------------------------------------------------------------------------------------------------------------------------------------------------------------------------------------------------------------------------------|----------------------------------------------------------------------------------------------------------------------------------------------------------------------------------------------------------------------------------------------------------------------------------------------------------------------------------------------------------------------------------------------------------------------------------------------------------------------------------------------------------------------------------------------------------------------------------------------------------------------------------------------------------------------------------------------------------------------------------------------------------------------------------------------------------------------------------------------------------------------------------------------------------------------------------------------------------------------------------------------------------------------------------------------------------------------------------------------------------------------------------------------------------------------------------------------------------------------------------------------------------------------------------------------------------------------------------------------------------------------------------------------------------------------------------------------------------------------------------------------------------------------------------------------------------------------------------------------------------------------------------------------------------------------------------------------------------------------------------------------------------------------------------------------------------------------|-----------------------------------------------------------------------------------------------------------------------------------------------------------------------------------------------------------------------------------------------------------------------------------------------------------------------------------------------------------------------------------------------------------------------------------------------------------------------------------------------------------------------------------------------------------------------------------------------------------------------------------------------------------------------------------------------------------------------------------------------------------------------------------------------------------------------------------------------------------------------------------------------------------------------------------------------------------------------------------------------------------------------------------------------------------------------------------------------------------------------------------------------------------------------------------------------------------------------------------------------------------------------------------------------------------------------------------------------------------------------------------------------------------------------------------------------------------------------------------------------------------------------------------------------------------------------------------------------------------------------------------------------------------------------------------------------------------------------------------------------------------------------------------------------------------------------------------|
| 1 -4.790939 -0.989274 1.868972<br>1 -3.345227 0.034917 1.711633<br>8 -0.264057 1.948713 1.392650<br>16 -0.804467 1.691631 0.053689<br>7 -0.857466 0.128665 -0.392977<br>16 0.238691 -0.994253 0.054048<br>6 0.396337 2.563154 -1.120162<br>6 0.942813 -1.500703 -1.624521<br>8 -2.114824 2.251198 -0.314838<br>8 1.386952 -0.517896 0.832724<br>8 -0.489519 -2.191756 0.500478<br>9 0.333412 3.880286 -0.891087<br>9 1.648635 2.141335 -0.915580<br>9 0.055557 2.325456 -2.393484<br>9 1.837434 -2.478796 -1.439286<br>9 -0.036523 -1.951929 -2.422915<br>9 1.543614 -0.464534 -2.219158<br>17 -2.167889 2.404300 5.002942<br>6 -0.636217 1.557315 4.614845<br>17 -0.795104 -0.206849 4.883260<br>17 0.726176 2.231597 5.557388<br>1 -0.430201 1.714237 3.559770<br>17 5.440131 -4.910356 -1.059680<br>6 6.220036 -3.462351 -1.763079<br>17 5.676924 -3.189379 -3.446983<br>17 8.003453 -3.579471 -1.672288<br>1 5.915240 -2.602213 -1.175052<br>17 -5.510512 4.192011 0.074403<br>6 -3.881672 4.942340 -0.018869<br>17 -3.573879 5.981013 1.403045<br>17 -3.688230 5.859448 -1.543821<br>1 -3.151881 4.137030 -0.017806<br>17 5.280712 -1.193181 2.212474<br>6 4.529695 0.164812 1.325081<br>17 5.149475 0.248230 -0.361276<br>17 4.787317 1.715952 2.174013<br>1 3.460952 -0.019407 1.266799<br>17 -1.517920 -5.105928 3.040373<br>6 0.045495 -4.916519 2.181901<br>17 0.244799 -6.184276 0.931211<br>17 1.414066 -4.926195 3.331890<br>1 0.029992 -3.953597 1.678183<br>17 4.421188 5.329917 -1.561227<br>6 5.583811 3.986605 -1.770318<br>17 7.251665 4.509072 -1.386348<br>17 5.486564 3.299622 -3.420606<br>1 5.314690 3.201031 -1.070998<br>17 -8.123905 -3.181024 -3.519031<br>6 -9.075652 -2.208936 -2.356789<br>17 -8.475016 -0.523201 -2.283056<br>17 -9.081285 -2.962602 -0.734802<br>1 -10.100599 -2.177481 -2.712309 | 6 5.396560 -3.379406 -2.636886<br>17 4.653911 -2.588270 -4.061338<br>17 7.141797 -3.672775 -2.899421<br>1 5.298341 -2.700975 -1.795085<br>17 -3.316321 6.549822 -0.517072<br>6 -3.888412 5.177238 0.477732<br>17 -5.425625 4.513423 -0.172342<br>17 -4.072389 5.652755 2.191566<br>1 -3.144361 4.386827 0.422107<br>17 5.063852 -2.108334 1.834606<br>6 4.682621 -0.417805 1.388651<br>17 5.233031 -0.058022 -0.283086<br>17 5.392827 0.735833 2.553250<br>1 3.602282 -0.303091 1.410062<br>17 -1.862642 -4.729961 3.183575<br>6 -0.226178 -4.632802 2.456664<br>17 -0.022602 -5.866594 1.173001<br>17 1.041528 -4.790489 3.707055<br>1 -0.129059 -3.655056 1.992485<br>17 6.111561 4.667378 -1.199705<br>6 4.920815 3.763396 -2.180534<br>17 5.734372 2.679552 -3.349698<br>17 3.790830 4.875441 -3.011894<br>1 4.337670 3.143948 -1.506494<br>1 -3.627563 0.471124 -3.819214<br>1 -2.672999 -0.239630 -0.728811<br>6 -3.482717 -1.655118 -2.028737<br>6 -3.011154 -2.967509 -1.413961<br>7 -3.625194 -0.503486 -1.046613<br>6 -4.219900 0.721495 -1.719585<br>6 -3.485958 1.157747 -2.981894<br>6 -4.421302 -0.909310 0.181170<br>6 -4.617406 0.202912 1.203951<br>1 -2.770577 -1.317145 -2.781057<br>1 -4.459651 -1.767884 -2.506275<br>1 -2.777155 -3.650759 -2.235562<br>1 -2.104471 -2.837726 -0.818209<br>1 -3.777610 -3.444337 -0.799572<br>1 -5.266095 0.479373 -1.924086<br>1 -4.179149 1.518845 -0.980653<br>1 -3.888408 2.129949 -3.280010<br>1 -2.415826 1.288051 -2.799535<br>1 -5.378196 -1.289435 -0.187505<br>1 -3.874627 -1.734989 0.634566<br>1 -5.081851 -0.241257 2.088949<br>1 -3.666414 0.642842 1.514559<br>1 -5.276096 0.998137 0.849412<br>17 -8.689275 -2.224246 -0.376799<br>6 -9.197758 -2.693697 -2.028480<br>17 -8.118188 -3.951573 -2.702447<br>17 -9.281992 -1.268860 -3.106529<br>1 -10.195060 -3.116085 -1.958129 | 1 -2.743746 0.013378 -3.044766<br>1 -3.801607 -0.773485 -4.225365<br>1 -4.190252 0.924112 -1.026957<br>1 -5.668769 0.017808 -0.644650<br>1 -4.810637 1.556886 1.199833<br>1 -4.988542 -0.106157 1.758919<br>1 -3.378074 0.540266 1.363410<br>8 -1.217621 -1.366354 0.369878<br>16 0.215226 -1.011478 0.362557<br>7 0.546944 0.556209 0.278920<br>16 -0.405344 1.660905 -0.423803<br>6 0.868988 -1.795466 -1.228946<br>6 0.777772 2.387368 -1.702206<br>8 1.071942 -1.596460 1.404847<br>8 -1.549161 1.148858 -1.195817<br>8 -0.640522 2.777150 0.509076<br>9 0.722647 -3.125544 -1.150530<br>9 0.183685 -1.347605 -2.290496<br>9 2.165267 -1.509068 -1.392722<br>9 0.155484 3.385233 -2.342672<br>9 1.874437 2.870111 -1.104581<br>9 1.138813 1.455996 -2.592812<br>17 0.126872 4.871872 3.844293<br>6 0.822071 3.277681 3.413106<br>17 0.358109 2.030459 4.612187<br>17 2.600907 3.377926 3.245075<br>1 0.408563 2.986840 2.450917<br>17 3.014373 -6.264958 -2.043160<br>6 4.004859 -4.855326 -2.528500<br>17 3.350746 -4.084925 -4.005546<br>17 5.719724 -5.315589 -2.746033<br>1 3.958797 -4.126832 -1.724731<br>17 -3.528544 4.986611 -1.589175<br>6 -2.825170 5.208705 0.044905<br>17 -4.082226 5.029607 1.310192<br>17 -1.998660 6.788559 0.177741<br>1 -2.086099 4.426001 0.197330<br>17 4.705253 -3.333320 1.218204<br>6 4.367950 -1.648153 1.738618<br>17 5.198020 -0.473961 0.673344<br>17 4.829077 -1.405880 3.448543<br>1 3.296562 -1.487467 1.650234<br>17 -1.722531 -2.866332 4.364653<br>6 -0.094030 -3.440977 3.880948<br>17 -0.174310 -5.103038 3.216467<br>17 1.048990 -3.351406 5.252822<br>1 0.269615 -2.785993 3.092983<br>17 4.376444 5.013794 -3.569455<br>6 5.161480 3.855984 -2.452166<br>17 6.416666 4.661552 -1.465023<br>17 5.836209 2.457377 -3.341678<br>1 4.398539 3.481176 -1.777548 | 1 -3.911875 1.660465 -2.671222<br>1 -5.214088 0.789411 -3.522011<br>8 -1.066762 -1.493733 0.023349<br>16 0.282738 -0.935582 0.192540<br>7 0.375518 0.673386 0.182825<br>16 -0.702842 1.659945 -0.491873<br>6 1.232394 -1.500568 -1.339888<br>6 0.391192 2.651998 -1.665116<br>8 1.112342 -1.423002 1.305307<br>8 -1.722778 1.046859 -1.368561<br>8 -1.160627 2.654897 0.494218<br>9 1.321723 -2.837115 -1.333134<br>9 0.591880 -1.115361 -2.453600<br>9 2.465461 -0.980778 -1.345145<br>9 -0.356095 3.595258 -2.252306<br>9 1.387012 3.240926 -0.991193<br>9 0.911277 1.857540 -2.607387<br>17 -0.844851 4.200970 4.204012<br>6 -0.071239 2.690486 3.628604<br>17 -0.776825 1.259157 4.443224<br>17 1.701755 2.750202 3.855280<br>1 -0.274758 2.600415 2.564895<br>17 5.139220 -5.041308 -1.949433<br>6 5.675506 -3.350583 -2.188526<br>17 5.000582 -2.667731 -3.699332<br>17 7.459863 -3.229790 -2.166533<br>1 5.294168 -2.763765 -1.358504<br>17 -3.766185 5.371808 -1.435385<br>6 -3.424181 5.035445 0.291169<br>17 -4.846716 4.291072 1.091556<br>17 -2.911949 6.519352 1.144743<br>1 -2.609976 4.316529 0.335913<br>17 4.921004 -2.553731 1.692176<br>6 4.242090 -0.970606 2.197005<br>17 5.015966 0.370835 1.298991<br>17 4.405417 -0.741325 3.962613<br>1 3.183289 -0.976011 1.950930<br>17 -1.583071 -3.288997 4.041695<br>6 -0.038476 -3.814181 3.298452<br>17 -0.290517 -5.236093 2.237823<br>17 1.191259 -4.157389 4.551141<br>1 0.328324 -2.998999 2.679598<br>17 4.467495 4.790375 -3.393924<br>6 4.873657 3.425770 -2.308127<br>17 6.217318 3.854785 -1.208169<br>17 5.248902 1.947239 -3.242335<br>1 3.999690 3.219260 -1.698799<br>17 -8.540884 -2.487250 -0.158010<br>6 -8.618011 -3.289517 -1.756304<br>17 -7.306447 -4.493830 -1.936978<br>17 -8.577492 -2.088200 -3.082120<br>1 -9.564131 -3.817908 -1.816148 |
|------------------------------------------------------------------------------------------------------------------------------------------------------------------------------------------------------------------------------------------------------------------------------------------------------------------------------------------------------------------------------------------------------------------------------------------------------------------------------------------------------------------------------------------------------------------------------------------------------------------------------------------------------------------------------------------------------------------------------------------------------------------------------------------------------------------------------------------------------------------------------------------------------------------------------------------------------------------------------------------------------------------------------------------------------------------------------------------------------------------------------------------------------------------------------------------------------------------------------------------------------------------------------------------------------------------------------------------------------------------------------------------------------------------------------------------------------------------------------------------------------------------------------------------------------------------------------------------------------------------------------------------------------------------------------------------------------------------------------------------------------------------------------------------------------------------------------------|------------------------------------------------------------------------------------------------------------------------------------------------------------------------------------------------------------------------------------------------------------------------------------------------------------------------------------------------------------------------------------------------------------------------------------------------------------------------------------------------------------------------------------------------------------------------------------------------------------------------------------------------------------------------------------------------------------------------------------------------------------------------------------------------------------------------------------------------------------------------------------------------------------------------------------------------------------------------------------------------------------------------------------------------------------------------------------------------------------------------------------------------------------------------------------------------------------------------------------------------------------------------------------------------------------------------------------------------------------------------------------------------------------------------------------------------------------------------------------------------------------------------------------------------------------------------------------------------------------------------------------------------------------------------------------------------------------------------------------------------------------------------------------------------------------------------------------------------------|----------------------------------------------------------------------------------------------------------------------------------------------------------------------------------------------------------------------------------------------------------------------------------------------------------------------------------------------------------------------------------------------------------------------------------------------------------------------------------------------------------------------------------------------------------------------------------------------------------------------------------------------------------------------------------------------------------------------------------------------------------------------------------------------------------------------------------------------------------------------------------------------------------------------------------------------------------------------------------------------------------------------------------------------------------------------------------------------------------------------------------------------------------------------------------------------------------------------------------------------------------------------------------------------------------------------------------------------------------------------------------------------------------------------------------------------------------------------------------------------------------------------------------------------------------------------------------------------------------------------------------------------------------------------------------------------------------------------------------------------------------------------------------------------------------------------|-----------------------------------------------------------------------------------------------------------------------------------------------------------------------------------------------------------------------------------------------------------------------------------------------------------------------------------------------------------------------------------------------------------------------------------------------------------------------------------------------------------------------------------------------------------------------------------------------------------------------------------------------------------------------------------------------------------------------------------------------------------------------------------------------------------------------------------------------------------------------------------------------------------------------------------------------------------------------------------------------------------------------------------------------------------------------------------------------------------------------------------------------------------------------------------------------------------------------------------------------------------------------------------------------------------------------------------------------------------------------------------------------------------------------------------------------------------------------------------------------------------------------------------------------------------------------------------------------------------------------------------------------------------------------------------------------------------------------------------------------------------------------------------------------------------------------------------|

|                                                                                                                                                                                                                                                                                                                                                                                                                                                                                                                                                                                                                                                                                                                                                                                                                                                                                                                                                                                                                                                                                                                                                                                                                                                                                                                                                                                                                                                                                                                                                                                                                                                                                                                                                                                                                                                                                                                                                                                        |                                                                                                                                                                                                                                                                                                                                                                                                                                                                                                                                                                                                                                                                                                                                                                                                                                                                                                                                                                                                                                                                                                                                                                                                                                                                                                                                                                                                                                                                                                                                                                                                                                                                                                                                                                                                                                                                                                                                                                                          |                                                                                                                                                                                                                                                                                                                                                                                                                                                                                                                                                                                                                                                                                                                                                                                                                                                                                                                                                                                                                                                                                                                                                                                                                                                                                                                                                                                                                                                                                                                                                                                                                                                                                                                                                                                                                                                                                                                                                                                               |                                                                                                                                                                                                                                                                                                                                                                                                                                                                                                                                                                                                                                                                                                                                                                                                                                                                                                                                                                                                                                                                                                                                                                                                                                                                                                                                                                                                                                                                                                                                                                                                                                                                                                                                                                                                                                                                                                                                                                                               |                                                                                                                                                                                                                                                                                                                                                                                                                                                                                                                                                                                                                                                                                                                                                                                                                                                                                                                                                                                                                                                                                                                                                                                                                                                                                                                                                                                                                                                                                                                                                                                                                                                                                                                                                                                                                                                                                                                                                                                                             |                                                                                                                                                                                                                                                                                                                                                                                                                                                                                                                                                                                                                                                                                                                                                                                                                                                                                                                                                                                                                                                                                                                                                                                                                                                                                                                                                                                                                                                                                                                                                                                                                                                                                                                                                                                                                                                                                                                                                                                                |
|----------------------------------------------------------------------------------------------------------------------------------------------------------------------------------------------------------------------------------------------------------------------------------------------------------------------------------------------------------------------------------------------------------------------------------------------------------------------------------------------------------------------------------------------------------------------------------------------------------------------------------------------------------------------------------------------------------------------------------------------------------------------------------------------------------------------------------------------------------------------------------------------------------------------------------------------------------------------------------------------------------------------------------------------------------------------------------------------------------------------------------------------------------------------------------------------------------------------------------------------------------------------------------------------------------------------------------------------------------------------------------------------------------------------------------------------------------------------------------------------------------------------------------------------------------------------------------------------------------------------------------------------------------------------------------------------------------------------------------------------------------------------------------------------------------------------------------------------------------------------------------------------------------------------------------------------------------------------------------------|------------------------------------------------------------------------------------------------------------------------------------------------------------------------------------------------------------------------------------------------------------------------------------------------------------------------------------------------------------------------------------------------------------------------------------------------------------------------------------------------------------------------------------------------------------------------------------------------------------------------------------------------------------------------------------------------------------------------------------------------------------------------------------------------------------------------------------------------------------------------------------------------------------------------------------------------------------------------------------------------------------------------------------------------------------------------------------------------------------------------------------------------------------------------------------------------------------------------------------------------------------------------------------------------------------------------------------------------------------------------------------------------------------------------------------------------------------------------------------------------------------------------------------------------------------------------------------------------------------------------------------------------------------------------------------------------------------------------------------------------------------------------------------------------------------------------------------------------------------------------------------------------------------------------------------------------------------------------------------------|-----------------------------------------------------------------------------------------------------------------------------------------------------------------------------------------------------------------------------------------------------------------------------------------------------------------------------------------------------------------------------------------------------------------------------------------------------------------------------------------------------------------------------------------------------------------------------------------------------------------------------------------------------------------------------------------------------------------------------------------------------------------------------------------------------------------------------------------------------------------------------------------------------------------------------------------------------------------------------------------------------------------------------------------------------------------------------------------------------------------------------------------------------------------------------------------------------------------------------------------------------------------------------------------------------------------------------------------------------------------------------------------------------------------------------------------------------------------------------------------------------------------------------------------------------------------------------------------------------------------------------------------------------------------------------------------------------------------------------------------------------------------------------------------------------------------------------------------------------------------------------------------------------------------------------------------------------------------------------------------------|-----------------------------------------------------------------------------------------------------------------------------------------------------------------------------------------------------------------------------------------------------------------------------------------------------------------------------------------------------------------------------------------------------------------------------------------------------------------------------------------------------------------------------------------------------------------------------------------------------------------------------------------------------------------------------------------------------------------------------------------------------------------------------------------------------------------------------------------------------------------------------------------------------------------------------------------------------------------------------------------------------------------------------------------------------------------------------------------------------------------------------------------------------------------------------------------------------------------------------------------------------------------------------------------------------------------------------------------------------------------------------------------------------------------------------------------------------------------------------------------------------------------------------------------------------------------------------------------------------------------------------------------------------------------------------------------------------------------------------------------------------------------------------------------------------------------------------------------------------------------------------------------------------------------------------------------------------------------------------------------------|-------------------------------------------------------------------------------------------------------------------------------------------------------------------------------------------------------------------------------------------------------------------------------------------------------------------------------------------------------------------------------------------------------------------------------------------------------------------------------------------------------------------------------------------------------------------------------------------------------------------------------------------------------------------------------------------------------------------------------------------------------------------------------------------------------------------------------------------------------------------------------------------------------------------------------------------------------------------------------------------------------------------------------------------------------------------------------------------------------------------------------------------------------------------------------------------------------------------------------------------------------------------------------------------------------------------------------------------------------------------------------------------------------------------------------------------------------------------------------------------------------------------------------------------------------------------------------------------------------------------------------------------------------------------------------------------------------------------------------------------------------------------------------------------------------------------------------------------------------------------------------------------------------------------------------------------------------------------------------------------------------------|------------------------------------------------------------------------------------------------------------------------------------------------------------------------------------------------------------------------------------------------------------------------------------------------------------------------------------------------------------------------------------------------------------------------------------------------------------------------------------------------------------------------------------------------------------------------------------------------------------------------------------------------------------------------------------------------------------------------------------------------------------------------------------------------------------------------------------------------------------------------------------------------------------------------------------------------------------------------------------------------------------------------------------------------------------------------------------------------------------------------------------------------------------------------------------------------------------------------------------------------------------------------------------------------------------------------------------------------------------------------------------------------------------------------------------------------------------------------------------------------------------------------------------------------------------------------------------------------------------------------------------------------------------------------------------------------------------------------------------------------------------------------------------------------------------------------------------------------------------------------------------------------------------------------------------------------------------------------------------------------|
| <p>[(C<sub>2</sub>H<sub>5</sub>)<sub>3</sub>NH][TFSI] hydrate <b>1a-6H2O</b><br/>B3LYP/6-31++G(d,p) OPT<br/>SCRFF=(PCM, Solvent=WATER)<br/>\HF=-2578.9775546\<br/>1 3.284457 -0.004117 1.512096<br/>1 1.769164 1.353602 -0.094026<br/>6 2.293577 2.894454 -1.395523<br/>6 2.724741 2.120739 -2.635169<br/>7 2.444255 2.135938 -0.084560<br/>6 3.829219 1.530812 0.063512<br/>6 4.046293 0.765869 1.363184<br/>6 2.098173 3.017395 1.105924<br/>6 0.773126 3.758084 0.981393<br/>1 2.873551 3.813328 -1.278367<br/>1 1.236312 3.147286 -1.473538<br/>1 2.436629 2.717750 -3.505464<br/>1 3.803699 1.962235 -2.689169<br/>1 2.211735 1.158944 -2.712691<br/>1 3.959190 0.860730 -0.784954<br/>1 4.535054 2.358759 -0.039125<br/>1 5.015466 0.264024 1.292523<br/>1 4.074118 1.414915 2.240528<br/>1 2.073227 2.356191 1.970396<br/>1 2.933814 3.712901 1.217565<br/>1 0.569363 4.227638 1.947784<br/>1 0.798096 4.546993 0.227393<br/>1 -0.055096 3.079635 0.762840<br/>8 -1.874698 -0.712588 1.277443<br/>16 -0.419988 -0.539594 1.436310<br/>7 0.421573 -0.459650 0.053520<br/>16 -0.027174 -1.199790 -1.324549<br/>6 0.133609 -2.115673 2.322796<br/>6 1.479237 -2.283240 -1.674706<br/>8 0.081873 0.539866 2.298665<br/>8 -1.145964 -2.154343 -1.222229<br/>8 -0.031123 -0.226710 -2.427894<br/>9 -0.442184 -2.151785 3.530949<br/>9 -0.234629 -3.199091 1.630222<br/>9 1.463485 -2.121256 2.472629<br/>9 1.282258 -2.920687 -3.834860<br/>9 2.585387 -1.536922 -1.768364<br/>9 1.639710 -3.184814 -0.700465<br/>8 -3.979346 -1.760982 -0.990738<br/>1 -3.007611 -1.845602 -1.019748<br/>1 -4.197901 -1.690508 -0.051275<br/>8 -1.035537 2.584531 -2.334716<br/>1 -0.770520 1.650899 -2.355703<br/>1 -1.935432 2.592914 -1.951280<br/>8 -3.633170 1.650378 1.441433<br/>1 -3.158343 0.809812 1.326421<br/>1 -3.656746 2.054359 0.547023<br/>8 -1.937865 2.562833 3.492296<br/>1 -1.176805 2.003556 3.273694<br/>1 -2.583023 2.364767 2.779935<br/>8 -4.796343 0.429814 -2.430390</p> | <p>[(C<sub>2</sub>H<sub>5</sub>)<sub>3</sub>NH][TFSI] hydrate <b>1b-6H2O</b><br/>B3LYP/6-31++G(d,p) OPT<br/>SCRFF=(PCM, Solvent=WATER)<br/>\HF=-2578.9736325\<br/>1 4.965588 -0.996950 0.916309<br/>1 2.260083 0.657479 -0.168095<br/>6 4.013968 0.438030 -1.266278<br/>6 3.512975 0.718685 -2.678069<br/>7 3.196724 1.092910 -0.163846<br/>6 3.797332 0.834920 1.209957<br/>6 4.117064 -0.627208 1.495202<br/>6 3.016328 2.580926 -0.420782<br/>6 2.250411 3.322887 0.665482<br/>1 3.986672 -0.631902 -1.065016<br/>1 5.040147 0.788405 -1.130541<br/>1 4.059990 0.058250 -3.356964<br/>1 2.447257 0.499591 -2.786765<br/>1 3.700828 1.745918 -2.996895<br/>1 4.692291 1.458461 1.271830<br/>1 3.064096 1.201862 1.926650<br/>1 4.380700 -0.704697 2.553852<br/>1 3.255112 -1.276613 1.321596<br/>1 4.022590 2.986696 -0.551715<br/>1 2.484600 2.660734 -1.368007<br/>1 2.074406 4.340317 0.305310<br/>1 1.276025 2.868565 0.858565<br/>1 2.803726 3.396253 1.603712<br/>8 -1.905560 -0.179498 1.520885<br/>16 -0.452856 -0.395845 1.501258<br/>7 0.249339 -0.447881 0.041954<br/>16 -0.494811 -0.845329 -1.346733<br/>6 -0.233112 -2.112258 2.264263<br/>6 0.404306 -2.424392 -1.865304<br/>8 0.396914 0.468491 2.340556<br/>8 -1.907836 -1.252714 -1.251297<br/>8 -0.109662 0.135911 -2.374392<br/>9 -0.582956 -2.056306 3.554835<br/>9 -1.017157 -2.995947 1.636153<br/>9 1.040376 -2.511942 2.173435<br/>9 -0.084387 -2.820897 -3.046148<br/>9 1.717570 -2.203705 -1.987112<br/>9 0.203987 -3.389130 -0.961375<br/>8 -0.842536 3.012411 -2.211892<br/>1 -0.516665 2.096814 -2.204997<br/>1 -0.748761 3.349625 -1.295932<br/>8 -0.689861 3.138072 2.839779<br/>1 -0.347602 2.226762 2.795617<br/>1 -1.364631 3.133983 3.532035<br/>8 -1.436990 4.129642 0.299089<br/>1 -2.331058 3.824168 0.047706<br/>1 -1.244131 3.765647 1.188093<br/>8 -4.063428 0.424179 -0.363900<br/>1 -3.450215 -0.152100 -0.857557<br/>1 -3.676685 0.428034 0.526729<br/>8 -3.562858 3.079720 -1.299077</p> | <p>[(C<sub>2</sub>H<sub>5</sub>)<sub>3</sub>NH][TFSI] hydrate <b>1c-6H2O</b><br/>B3LYP/6-31++G(d,p) OPT<br/>SCRFF=(PCM, Solvent=WATER)<br/>\HF=-2578.9584759\<br/>1 4.813820 -0.328043 2.133074<br/>1 1.936241 -0.266833 -0.166299<br/>6 3.368571 -0.452900 -1.590259<br/>6 4.800298 -0.908173 -1.840454<br/>7 2.966597 -0.200263 -0.141095<br/>6 3.349497 -1.302315 0.841061<br/>6 4.724273 -1.206915 1.490567<br/>6 3.203073 1.224917 0.351340<br/>6 4.579064 1.826773 0.094451<br/>1 3.147119 0.475575 -2.119730<br/>1 2.675268 -1.215056 -1.952187<br/>1 4.920620 -1.005366 -2.923611<br/>1 5.547632 -0.197458 -1.486411<br/>1 5.003812 -1.888122 -1.402775<br/>1 2.578173 -1.266657 1.612417<br/>1 3.231084 -2.239151 0.292429<br/>1 4.837861 -2.088317 2.128935<br/>1 5.545310 -1.209375 0.772744<br/>1 2.447987 1.826132 -0.161386<br/>1 2.966513 1.207208 1.416482<br/>1 4.577697 2.824642 0.543730<br/>1 5.395550 1.261976 0.545949<br/>1 4.779450 1.954247 -0.971958<br/>8 -1.869578 0.670917 1.501452<br/>16 -0.697462 -0.219440 1.399701<br/>7 -0.144231 -0.515167 -0.092171<br/>16 -0.970128 -0.340165 -1.485805<br/>6 -1.298055 -1.875715 2.093397<br/>6 -1.225466 -2.119366 -2.070430<br/>8 0.484084 0.079912 2.225156<br/>8 -2.325015 0.225325 -1.379032<br/>8 -0.043746 0.216175 -2.482980<br/>9 -1.522645 -1.726450 3.403471<br/>9 -2.430932 -2.252753 1.494421<br/>9 -0.364786 -2.814529 1.909706<br/>9 -1.768628 -2.087494 -3.292726<br/>9 -0.054860 -2.762391 -2.125502<br/>9 -2.047927 -2.769333 -1.241501<br/>8 -4.730473 0.312185 0.641514<br/>1 -3.794293 0.406378 0.881134<br/>1 -4.707821 0.098478 -0.300959<br/>8 1.379709 2.789080 -2.107189<br/>1 0.886008 1.978159 -2.310013<br/>1 0.701223 3.424896 -1.800244<br/>8 -2.224685 3.579937 1.152160<br/>1 -1.934335 2.687852 1.406648<br/>1 -1.469335 3.983923 0.687638<br/>8 1.152081 2.396709 3.896957<br/>1 0.838014 1.646888 3.363834<br/>1 0.410232 2.629429 4.470712<br/>8 -3.069106 3.113384 -1.510484</p> | <p>[(C<sub>2</sub>H<sub>5</sub>)<sub>3</sub>NH][TFSI] hydrate <b>2a-6H2O</b><br/>B3LYP/6-31++G(d,p) OPT<br/>SCRFF=(PCM, Solvent=WATER)<br/>\HF=-2578.9780822\<br/>1 4.464668 -2.262593 1.370142<br/>1 3.056763 -0.043367 -0.075565<br/>6 4.164447 0.932853 -1.537899<br/>6 3.107623 0.649090 -2.597677<br/>7 4.056719 0.027781 -0.321559<br/>6 4.550087 -1.375010 -0.634543<br/>6 4.071297 -2.421503 0.363342<br/>6 4.787429 0.615769 0.874303<br/>6 4.064134 1.797693 1.505955<br/>1 5.178641 0.802901 -1.922884<br/>1 4.064814 1.955317 -1.175549<br/>1 3.232121 1.380317 -3.401264<br/>1 3.204083 -0.345266 -3.040320<br/>1 2.097556 0.759005 -2.194432<br/>1 4.186235 -1.616467 -1.632703<br/>1 5.639993 -1.311198 -0.673889<br/>1 2.979383 -2.455095 0.410812<br/>1 4.424735 -3.398813 0.022959<br/>1 4.894634 -0.188823 1.600985<br/>1 5.782946 0.888782 0.516902<br/>1 4.641036 2.118710 2.377712<br/>1 3.977906 2.654737 0.834406<br/>1 3.064638 1.518680 1.850489<br/>8 -0.937967 0.155322 -2.075075<br/>16 -1.809093 -0.676491 -1.227557<br/>7 -1.479310 -0.615403 0.357729<br/>16 -0.080552 -0.025180 0.932160<br/>6 -1.400189 -2.454137 -1.716990<br/>6 -0.009167 -1.009947 2.541573<br/>8 -3.265930 -0.594947 -1.399442<br/>8 1.132033 -0.405754 0.184808<br/>8 -0.195251 1.388150 1.353068<br/>9 -1.689820 -2.625365 -3.013489<br/>9 -0.102466 -2.707694 -1.520471<br/>9 -2.129005 -3.308592 -0.989254<br/>9 1.100441 -0.646011 3.194883<br/>9 -1.074422 -0.748924 3.303285<br/>9 0.043347 -2.318800 2.281497<br/>8 -2.815146 2.919768 1.277745<br/>1 -3.546279 2.334853 0.966906<br/>1 -2.043628 2.339160 1.387260<br/>8 0.940392 3.718700 -0.283056<br/>1 0.620296 3.393839 -1.151107<br/>1 0.744454 2.992844 0.331421<br/>8 -4.817356 1.205137 0.409308<br/>1 -4.724462 0.455661 1.038416<br/>1 -4.480647 0.834605 -0.423032<br/>8 -0.634460 3.048545 -2.551968<br/>1 -1.284300 3.564220 -2.027076<br/>1 -0.877532 2.113703 -2.443566<br/>8 -1.823592 4.700601 -0.595841</p> | <p>[(C<sub>2</sub>H<sub>5</sub>)<sub>3</sub>NH][TFSI] hydrate <b>2b-6H2O</b><br/>B3LYP/6-31++G(d,p) OPT<br/>SCRFF=(PCM, Solvent=WATER)<br/>\HF=-2578.9705702\<br/>1 -1.775580 -1.987041 -2.106099<br/>1 -2.365489 -1.217048 0.312879<br/>6 -2.307979 -3.217146 0.855919<br/>6 -1.630118 -3.049535 2.209877<br/>7 -3.053298 -1.982781 0.377306<br/>6 -3.648426 -2.185622 -1.006750<br/>6 -2.652947 -2.637582 -2.068236<br/>6 -4.116372 -1.552562 1.375932<br/>6 -4.894033 -0.305967 0.971877<br/>1 -1.558318 -3.426708 0.095728<br/>1 -3.037894 -4.030307 0.864132<br/>1 -1.000463 -3.928446 2.375049<br/>1 -0.980732 -2.169732 2.226009<br/>1 -2.336915 -2.991144 3.039769<br/>1 -4.459363 -2.907591 -0.884000<br/>1 -4.081037 -1.227138 -1.289549<br/>1 -2.324822 -3.669857 -1.930452<br/>1 -3.157858 -2.579409 -3.036703<br/>1 -4.774911 -2.414903 1.506131<br/>1 -3.594408 -1.374869 2.314852<br/>1 -5.504704 -0.007455 1.828769<br/>1 -4.224803 0.524919 0.733676<br/>1 -5.569736 -0.478745 0.131918<br/>8 0.094209 -1.374671 -0.369209<br/>16 1.180272 -0.387595 -0.328235<br/>7 0.748592 1.177099 -0.320887<br/>16 -0.726057 1.719857 0.051074<br/>6 2.031779 -0.491139 -2.010639<br/>6 -1.554937 2.038296 -1.616187<br/>8 -2.275149 -0.598697 0.643901<br/>8 -1.601921 0.750110 0.737264<br/>8 -0.579495 3.062795 0.629471<br/>9 2.519953 -1.728596 -2.160255<br/>9 1.152834 -0.244699 -2.986821<br/>9 3.034013 0.389162 -2.084114<br/>9 -2.762785 2.574952 -1.407185<br/>9 -0.816134 2.885225 -2.339773<br/>9 -1.695009 0.890528 -2.290619<br/>8 0.725376 2.858480 3.361392<br/>1 1.581196 2.440562 3.105729<br/>1 0.349056 3.174938 2.523605<br/>8 6.502240 -2.792395 0.556518<br/>1 5.554048 -2.830216 0.805353<br/>1 6.513559 -2.694569 -0.404227<br/>8 3.090601 1.715599 2.436974<br/>1 3.225758 2.285191 1.647933<br/>1 2.859288 0.850625 2.059611<br/>8 3.836078 -2.908441 1.405397<br/>1 3.363471 -3.730483 1.217110<br/>1 3.251462 -2.189894 1.102916<br/>8 -1.181745 0.861195 3.885700</p> | <p>[(C<sub>2</sub>H<sub>5</sub>)<sub>3</sub>NH][TFSI] hydrate <b>2c-6H2O</b><br/>B3LYP/6-31++G(d,p) OPT<br/>SCRFF=(PCM, Solvent=WATER)<br/>\HF=-2578.9788986\<br/>1 5.583830 -1.995694 -1.581680<br/>1 3.587937 0.811178 0.176126<br/>6 5.393158 1.180582 -0.680126<br/>6 6.487278 0.604169 -1.571534<br/>7 4.412260 0.199677 -0.062076<br/>6 3.816515 -0.814992 -1.023697<br/>6 4.569107 -2.128063 -1.203594<br/>6 4.817270 -0.351407 1.294227<br/>6 6.239399 -0.880488 1.437668<br/>1 5.817132 1.743451 0.154459<br/>1 4.776630 1.871530 -1.260780<br/>1 7.107586 1.440595 -1.907494<br/>1 7.136284 -0.104115 -1.054590<br/>1 6.077649 0.124938 -2.463788<br/>1 2.812730 -1.014030 -0.640294<br/>1 3.704821 -0.290122 -1.975381<br/>1 4.607620 -2.708708 -0.278763<br/>1 4.015359 -2.722295 -1.936837<br/>1 4.663083 0.475609 1.992760<br/>1 4.082235 -1.123398 1.532773<br/>1 6.347084 -1.249681 2.462077<br/>1 6.461118 -1.707382 0.761763<br/>1 6.985506 -0.095013 1.296046<br/>8 -1.004214 0.686861 -1.962622<br/>16 -2.225926 0.167928 -1.323904<br/>7 -2.048256 -0.328163 0.205441<br/>16 -0.587475 -0.622439 0.861000<br/>6 -2.630356 -1.407668 -2.283237<br/>6 -1.102429 -1.937928 2.112137<br/>8 -3.465701 0.953940 -1.412575<br/>8 0.403725 -1.267940 -0.008755<br/>8 -0.124389 0.515829 1.691122<br/>9 -2.852068 -1.093709 -3.566605<br/>9 -1.612888 -2.272860 -2.213988<br/>9 -3.728620 -1.982753 -1.778561<br/>9 -0.005314 -2.315393 2.780319<br/>9 -1.997692 -1.453618 2.977635<br/>9 -1.619653 -2.998085 1.484555<br/>8 -1.649190 3.125194 1.909073<br/>1 -2.570025 2.948913 1.597357<br/>1 -1.190535 2.268540 1.876988<br/>8 2.316476 1.828969 0.624223<br/>1 1.832499 2.244796 -0.136172<br/>1 1.622970 1.370412 1.129052<br/>8 -4.183104 2.648028 0.916248<br/>1 -4.489769 1.815377 1.338384<br/>1 -3.896689 2.371747 0.002991<br/>8 0.353007 2.936963 -1.385501<br/>1 0.345098 3.650020 -0.927555<br/>1 0.197322 2.265298 -1.639465<br/>8 -0.560092 4.793956 0.062465</p> |
|----------------------------------------------------------------------------------------------------------------------------------------------------------------------------------------------------------------------------------------------------------------------------------------------------------------------------------------------------------------------------------------------------------------------------------------------------------------------------------------------------------------------------------------------------------------------------------------------------------------------------------------------------------------------------------------------------------------------------------------------------------------------------------------------------------------------------------------------------------------------------------------------------------------------------------------------------------------------------------------------------------------------------------------------------------------------------------------------------------------------------------------------------------------------------------------------------------------------------------------------------------------------------------------------------------------------------------------------------------------------------------------------------------------------------------------------------------------------------------------------------------------------------------------------------------------------------------------------------------------------------------------------------------------------------------------------------------------------------------------------------------------------------------------------------------------------------------------------------------------------------------------------------------------------------------------------------------------------------------------|------------------------------------------------------------------------------------------------------------------------------------------------------------------------------------------------------------------------------------------------------------------------------------------------------------------------------------------------------------------------------------------------------------------------------------------------------------------------------------------------------------------------------------------------------------------------------------------------------------------------------------------------------------------------------------------------------------------------------------------------------------------------------------------------------------------------------------------------------------------------------------------------------------------------------------------------------------------------------------------------------------------------------------------------------------------------------------------------------------------------------------------------------------------------------------------------------------------------------------------------------------------------------------------------------------------------------------------------------------------------------------------------------------------------------------------------------------------------------------------------------------------------------------------------------------------------------------------------------------------------------------------------------------------------------------------------------------------------------------------------------------------------------------------------------------------------------------------------------------------------------------------------------------------------------------------------------------------------------------------|-----------------------------------------------------------------------------------------------------------------------------------------------------------------------------------------------------------------------------------------------------------------------------------------------------------------------------------------------------------------------------------------------------------------------------------------------------------------------------------------------------------------------------------------------------------------------------------------------------------------------------------------------------------------------------------------------------------------------------------------------------------------------------------------------------------------------------------------------------------------------------------------------------------------------------------------------------------------------------------------------------------------------------------------------------------------------------------------------------------------------------------------------------------------------------------------------------------------------------------------------------------------------------------------------------------------------------------------------------------------------------------------------------------------------------------------------------------------------------------------------------------------------------------------------------------------------------------------------------------------------------------------------------------------------------------------------------------------------------------------------------------------------------------------------------------------------------------------------------------------------------------------------------------------------------------------------------------------------------------------------|-----------------------------------------------------------------------------------------------------------------------------------------------------------------------------------------------------------------------------------------------------------------------------------------------------------------------------------------------------------------------------------------------------------------------------------------------------------------------------------------------------------------------------------------------------------------------------------------------------------------------------------------------------------------------------------------------------------------------------------------------------------------------------------------------------------------------------------------------------------------------------------------------------------------------------------------------------------------------------------------------------------------------------------------------------------------------------------------------------------------------------------------------------------------------------------------------------------------------------------------------------------------------------------------------------------------------------------------------------------------------------------------------------------------------------------------------------------------------------------------------------------------------------------------------------------------------------------------------------------------------------------------------------------------------------------------------------------------------------------------------------------------------------------------------------------------------------------------------------------------------------------------------------------------------------------------------------------------------------------------------|-------------------------------------------------------------------------------------------------------------------------------------------------------------------------------------------------------------------------------------------------------------------------------------------------------------------------------------------------------------------------------------------------------------------------------------------------------------------------------------------------------------------------------------------------------------------------------------------------------------------------------------------------------------------------------------------------------------------------------------------------------------------------------------------------------------------------------------------------------------------------------------------------------------------------------------------------------------------------------------------------------------------------------------------------------------------------------------------------------------------------------------------------------------------------------------------------------------------------------------------------------------------------------------------------------------------------------------------------------------------------------------------------------------------------------------------------------------------------------------------------------------------------------------------------------------------------------------------------------------------------------------------------------------------------------------------------------------------------------------------------------------------------------------------------------------------------------------------------------------------------------------------------------------------------------------------------------------------------------------------------------------|------------------------------------------------------------------------------------------------------------------------------------------------------------------------------------------------------------------------------------------------------------------------------------------------------------------------------------------------------------------------------------------------------------------------------------------------------------------------------------------------------------------------------------------------------------------------------------------------------------------------------------------------------------------------------------------------------------------------------------------------------------------------------------------------------------------------------------------------------------------------------------------------------------------------------------------------------------------------------------------------------------------------------------------------------------------------------------------------------------------------------------------------------------------------------------------------------------------------------------------------------------------------------------------------------------------------------------------------------------------------------------------------------------------------------------------------------------------------------------------------------------------------------------------------------------------------------------------------------------------------------------------------------------------------------------------------------------------------------------------------------------------------------------------------------------------------------------------------------------------------------------------------------------------------------------------------------------------------------------------------|



|                                                                                                                                                                                                                                                                                                                                                                                                                                                                                                                                                                                                                                                                                                                                                                                                                                                                                                                                                                                                                                                                                                                                                                                                                                                                                                                                                                                                                                                                                                                                                                                                                                                                                                                                         |                                                                                                                                                                                                                                                                                                                                                                                                                                                                                                                                                                                                                                                                                                                                                                                                                                                                                                                                                                                                                                                                                                                                                                                                                                                                                                                                                                                                                                                                                                                                                                                                                                                                                                                                |                                                                                                                                                                                                                                                                                                                                                                                                                                                                                                                                                                                                                                                                                                                                                                                                                                                                                                                                                                                                                                                                                                                                                                                                                                                                                                                                                                                                                                                                                                                                                                                                                                                                                                                          |                                                                                                                                                                                                                                                                                                                                                                                                                                                                                                                                                                                                                                                                                                                                                                                                                                                                                                                                                                                                                                                                                                                                                                                                                                                                                                                                                                                                                                                                                                                                                                                                                                                                                                                             |                                                                                                                                                                                                                                                                                                                                                                                                                                                                                                                                                                                                                                                                                                                                                                                                                                                                                                                                                                                                                                                                                                                                                                                                                                                                                                                                                                                                                                                                                                                                                                                                                                                                                                                          |                                                                                                                                                                                                                                                                                                                                                                                                                                                                                                                                                                                                                                                                                                                                                                                                                                                                                                                                                                                                                                                                                                                                                                                                                                                                                                                                                                                                                                                                                                                                                                                                                                                                                                                                    |
|-----------------------------------------------------------------------------------------------------------------------------------------------------------------------------------------------------------------------------------------------------------------------------------------------------------------------------------------------------------------------------------------------------------------------------------------------------------------------------------------------------------------------------------------------------------------------------------------------------------------------------------------------------------------------------------------------------------------------------------------------------------------------------------------------------------------------------------------------------------------------------------------------------------------------------------------------------------------------------------------------------------------------------------------------------------------------------------------------------------------------------------------------------------------------------------------------------------------------------------------------------------------------------------------------------------------------------------------------------------------------------------------------------------------------------------------------------------------------------------------------------------------------------------------------------------------------------------------------------------------------------------------------------------------------------------------------------------------------------------------|--------------------------------------------------------------------------------------------------------------------------------------------------------------------------------------------------------------------------------------------------------------------------------------------------------------------------------------------------------------------------------------------------------------------------------------------------------------------------------------------------------------------------------------------------------------------------------------------------------------------------------------------------------------------------------------------------------------------------------------------------------------------------------------------------------------------------------------------------------------------------------------------------------------------------------------------------------------------------------------------------------------------------------------------------------------------------------------------------------------------------------------------------------------------------------------------------------------------------------------------------------------------------------------------------------------------------------------------------------------------------------------------------------------------------------------------------------------------------------------------------------------------------------------------------------------------------------------------------------------------------------------------------------------------------------------------------------------------------------|--------------------------------------------------------------------------------------------------------------------------------------------------------------------------------------------------------------------------------------------------------------------------------------------------------------------------------------------------------------------------------------------------------------------------------------------------------------------------------------------------------------------------------------------------------------------------------------------------------------------------------------------------------------------------------------------------------------------------------------------------------------------------------------------------------------------------------------------------------------------------------------------------------------------------------------------------------------------------------------------------------------------------------------------------------------------------------------------------------------------------------------------------------------------------------------------------------------------------------------------------------------------------------------------------------------------------------------------------------------------------------------------------------------------------------------------------------------------------------------------------------------------------------------------------------------------------------------------------------------------------------------------------------------------------------------------------------------------------|-----------------------------------------------------------------------------------------------------------------------------------------------------------------------------------------------------------------------------------------------------------------------------------------------------------------------------------------------------------------------------------------------------------------------------------------------------------------------------------------------------------------------------------------------------------------------------------------------------------------------------------------------------------------------------------------------------------------------------------------------------------------------------------------------------------------------------------------------------------------------------------------------------------------------------------------------------------------------------------------------------------------------------------------------------------------------------------------------------------------------------------------------------------------------------------------------------------------------------------------------------------------------------------------------------------------------------------------------------------------------------------------------------------------------------------------------------------------------------------------------------------------------------------------------------------------------------------------------------------------------------------------------------------------------------------------------------------------------------|--------------------------------------------------------------------------------------------------------------------------------------------------------------------------------------------------------------------------------------------------------------------------------------------------------------------------------------------------------------------------------------------------------------------------------------------------------------------------------------------------------------------------------------------------------------------------------------------------------------------------------------------------------------------------------------------------------------------------------------------------------------------------------------------------------------------------------------------------------------------------------------------------------------------------------------------------------------------------------------------------------------------------------------------------------------------------------------------------------------------------------------------------------------------------------------------------------------------------------------------------------------------------------------------------------------------------------------------------------------------------------------------------------------------------------------------------------------------------------------------------------------------------------------------------------------------------------------------------------------------------------------------------------------------------------------------------------------------------|------------------------------------------------------------------------------------------------------------------------------------------------------------------------------------------------------------------------------------------------------------------------------------------------------------------------------------------------------------------------------------------------------------------------------------------------------------------------------------------------------------------------------------------------------------------------------------------------------------------------------------------------------------------------------------------------------------------------------------------------------------------------------------------------------------------------------------------------------------------------------------------------------------------------------------------------------------------------------------------------------------------------------------------------------------------------------------------------------------------------------------------------------------------------------------------------------------------------------------------------------------------------------------------------------------------------------------------------------------------------------------------------------------------------------------------------------------------------------------------------------------------------------------------------------------------------------------------------------------------------------------------------------------------------------------------------------------------------------------|
| 1 -4.546892 -0.375293 -1.914927                                                                                                                                                                                                                                                                                                                                                                                                                                                                                                                                                                                                                                                                                                                                                                                                                                                                                                                                                                                                                                                                                                                                                                                                                                                                                                                                                                                                                                                                                                                                                                                                                                                                                                         | 1 -3.803739 2.174962 -1.014158                                                                                                                                                                                                                                                                                                                                                                                                                                                                                                                                                                                                                                                                                                                                                                                                                                                                                                                                                                                                                                                                                                                                                                                                                                                                                                                                                                                                                                                                                                                                                                                                                                                                                                 | 1 -2.860905 2.175700 -1.661048                                                                                                                                                                                                                                                                                                                                                                                                                                                                                                                                                                                                                                                                                                                                                                                                                                                                                                                                                                                                                                                                                                                                                                                                                                                                                                                                                                                                                                                                                                                                                                                                                                                                                           | 1 -0.897414 4.715611 -0.291429                                                                                                                                                                                                                                                                                                                                                                                                                                                                                                                                                                                                                                                                                                                                                                                                                                                                                                                                                                                                                                                                                                                                                                                                                                                                                                                                                                                                                                                                                                                                                                                                                                                                                              | 1 -1.456976 0.686722 2.973479                                                                                                                                                                                                                                                                                                                                                                                                                                                                                                                                                                                                                                                                                                                                                                                                                                                                                                                                                                                                                                                                                                                                                                                                                                                                                                                                                                                                                                                                                                                                                                                                                                                                                            | 1 -0.032438 5.482891 0.487489                                                                                                                                                                                                                                                                                                                                                                                                                                                                                                                                                                                                                                                                                                                                                                                                                                                                                                                                                                                                                                                                                                                                                                                                                                                                                                                                                                                                                                                                                                                                                                                                                                                                                                      |
| 1 -5.755005 0.394655 -2.546891                                                                                                                                                                                                                                                                                                                                                                                                                                                                                                                                                                                                                                                                                                                                                                                                                                                                                                                                                                                                                                                                                                                                                                                                                                                                                                                                                                                                                                                                                                                                                                                                                                                                                                          | 1 -2.767206 2.968133 -1.857550                                                                                                                                                                                                                                                                                                                                                                                                                                                                                                                                                                                                                                                                                                                                                                                                                                                                                                                                                                                                                                                                                                                                                                                                                                                                                                                                                                                                                                                                                                                                                                                                                                                                                                 | 1 -3.085799 3.203729 -0.534408                                                                                                                                                                                                                                                                                                                                                                                                                                                                                                                                                                                                                                                                                                                                                                                                                                                                                                                                                                                                                                                                                                                                                                                                                                                                                                                                                                                                                                                                                                                                                                                                                                                                                           | 1 -2.275801 4.114550 0.055955                                                                                                                                                                                                                                                                                                                                                                                                                                                                                                                                                                                                                                                                                                                                                                                                                                                                                                                                                                                                                                                                                                                                                                                                                                                                                                                                                                                                                                                                                                                                                                                                                                                                                               | 1 -0.489246 1.552608 3.795568                                                                                                                                                                                                                                                                                                                                                                                                                                                                                                                                                                                                                                                                                                                                                                                                                                                                                                                                                                                                                                                                                                                                                                                                                                                                                                                                                                                                                                                                                                                                                                                                                                                                                            | 1 -0.940099 4.238965 0.791406                                                                                                                                                                                                                                                                                                                                                                                                                                                                                                                                                                                                                                                                                                                                                                                                                                                                                                                                                                                                                                                                                                                                                                                                                                                                                                                                                                                                                                                                                                                                                                                                                                                                                                      |
| 8 -3.675917 2.567414 -1.219765                                                                                                                                                                                                                                                                                                                                                                                                                                                                                                                                                                                                                                                                                                                                                                                                                                                                                                                                                                                                                                                                                                                                                                                                                                                                                                                                                                                                                                                                                                                                                                                                                                                                                                          | 8 -6.789602 -0.303967 -0.487133                                                                                                                                                                                                                                                                                                                                                                                                                                                                                                                                                                                                                                                                                                                                                                                                                                                                                                                                                                                                                                                                                                                                                                                                                                                                                                                                                                                                                                                                                                                                                                                                                                                                                                | 8 -0.697378 4.488730 -1.185395                                                                                                                                                                                                                                                                                                                                                                                                                                                                                                                                                                                                                                                                                                                                                                                                                                                                                                                                                                                                                                                                                                                                                                                                                                                                                                                                                                                                                                                                                                                                                                                                                                                                                           | 8 -4.038806 -0.933656 2.005371                                                                                                                                                                                                                                                                                                                                                                                                                                                                                                                                                                                                                                                                                                                                                                                                                                                                                                                                                                                                                                                                                                                                                                                                                                                                                                                                                                                                                                                                                                                                                                                                                                                                                              | 8 3.035866 3.110779 0.013502                                                                                                                                                                                                                                                                                                                                                                                                                                                                                                                                                                                                                                                                                                                                                                                                                                                                                                                                                                                                                                                                                                                                                                                                                                                                                                                                                                                                                                                                                                                                                                                                                                                                                             | 8 -4.598978 0.056960 1.832698                                                                                                                                                                                                                                                                                                                                                                                                                                                                                                                                                                                                                                                                                                                                                                                                                                                                                                                                                                                                                                                                                                                                                                                                                                                                                                                                                                                                                                                                                                                                                                                                                                                                                                      |
| 1 -4.162196 1.840352 -1.690777                                                                                                                                                                                                                                                                                                                                                                                                                                                                                                                                                                                                                                                                                                                                                                                                                                                                                                                                                                                                                                                                                                                                                                                                                                                                                                                                                                                                                                                                                                                                                                                                                                                                                                          | 1 -5.833608 -0.099141 -0.427686                                                                                                                                                                                                                                                                                                                                                                                                                                                                                                                                                                                                                                                                                                                                                                                                                                                                                                                                                                                                                                                                                                                                                                                                                                                                                                                                                                                                                                                                                                                                                                                                                                                                                                | 1 -1.529921 4.092770 -1.536037                                                                                                                                                                                                                                                                                                                                                                                                                                                                                                                                                                                                                                                                                                                                                                                                                                                                                                                                                                                                                                                                                                                                                                                                                                                                                                                                                                                                                                                                                                                                                                                                                                                                                           | 1 -3.173423 -1.001307 1.561454                                                                                                                                                                                                                                                                                                                                                                                                                                                                                                                                                                                                                                                                                                                                                                                                                                                                                                                                                                                                                                                                                                                                                                                                                                                                                                                                                                                                                                                                                                                                                                                                                                                                                              | 1 2.223059 2.643165 -0.255665                                                                                                                                                                                                                                                                                                                                                                                                                                                                                                                                                                                                                                                                                                                                                                                                                                                                                                                                                                                                                                                                                                                                                                                                                                                                                                                                                                                                                                                                                                                                                                                                                                                                                            | 1 -3.821219 -0.259387 1.336486                                                                                                                                                                                                                                                                                                                                                                                                                                                                                                                                                                                                                                                                                                                                                                                                                                                                                                                                                                                                                                                                                                                                                                                                                                                                                                                                                                                                                                                                                                                                                                                                                                                                                                     |
| 1 -4.163895 3.384054 -1.393466                                                                                                                                                                                                                                                                                                                                                                                                                                                                                                                                                                                                                                                                                                                                                                                                                                                                                                                                                                                                                                                                                                                                                                                                                                                                                                                                                                                                                                                                                                                                                                                                                                                                                                          | 1 -6.870744 -1.231845 -0.231325                                                                                                                                                                                                                                                                                                                                                                                                                                                                                                                                                                                                                                                                                                                                                                                                                                                                                                                                                                                                                                                                                                                                                                                                                                                                                                                                                                                                                                                                                                                                                                                                                                                                                                | 1 -0.679012 5.407972 -1.484284                                                                                                                                                                                                                                                                                                                                                                                                                                                                                                                                                                                                                                                                                                                                                                                                                                                                                                                                                                                                                                                                                                                                                                                                                                                                                                                                                                                                                                                                                                                                                                                                                                                                                           | 1 -4.456926 -1.799770 1.904366                                                                                                                                                                                                                                                                                                                                                                                                                                                                                                                                                                                                                                                                                                                                                                                                                                                                                                                                                                                                                                                                                                                                                                                                                                                                                                                                                                                                                                                                                                                                                                                                                                                                                              | 1 2.809321 4.050757 0.026982                                                                                                                                                                                                                                                                                                                                                                                                                                                                                                                                                                                                                                                                                                                                                                                                                                                                                                                                                                                                                                                                                                                                                                                                                                                                                                                                                                                                                                                                                                                                                                                                                                                                                             | 1 -5.351182 -0.449851 1.497284                                                                                                                                                                                                                                                                                                                                                                                                                                                                                                                                                                                                                                                                                                                                                                                                                                                                                                                                                                                                                                                                                                                                                                                                                                                                                                                                                                                                                                                                                                                                                                                                                                                                                                     |
| [[C <sub>2</sub> H <sub>5</sub> ] <sub>3</sub> NH][TFSI] hydrate <b>3a-6H2O</b><br>B3LYP/6-31++G(d,p) OPT<br>SCRF=(PCM, Solvent=WATER)<br>\HF=-2578.9688229\<br>1 -5.288688 2.140361 -0.135130<br>1 -4.864142 0.039319 1.087700<br>6 -3.050205 -0.978870 1.200821<br>6 -2.621138 -0.074386 2.346078<br>7 -4.211940 -0.404212 0.411508<br>6 -3.729850 0.676036 -0.543678<br>6 -4.837448 1.624493 -0.987644<br>6 -4.978866 -1.484309 -0.327905<br>6 -5.815754 -2.371687 0.585832<br>1 -2.244016 -1.150927 0.484048<br>1 -3.372141 -1.945276 1.588070<br>1 -1.757816 -0.542464 2.844972<br>1 -2.295435 0.913204 2.001262<br>1 -3.407815 0.043996 3.086267<br>1 -2.947766 1.235291 -0.027438<br>1 -3.279575 0.147494 -1.387670<br>1 -4.393231 2.381577 -1.640449<br>1 -5.628124 1.126860 -1.555185<br>1 -5.627011 -0.970511 -1.038229<br>1 -4.236777 -2.048569 -0.897086<br>1 -6.376158 -3.070645 -0.041687<br>1 -5.211577 -2.964789 1.276550<br>1 -6.537297 -1.787950 1.164280<br>8 1.396593 -0.311462 -2.031631<br>16 1.153251 -1.168777 -0.859804<br>7 1.277718 -0.464680 0.579063<br>16 2.142300 0.856269 0.924709<br>6 2.543775 -2.443913 -0.933442<br>6 3.239395 0.206784 2.315591<br>8 -0.065743 -1.996182 -0.833650<br>8 3.079440 1.334192 -0.109599<br>8 1.287455 1.850700 1.595709<br>9 2.429441 -3.151689 -2.065371<br>9 3.735198 -1.832836 -0.920890<br>9 2.469218 -3.277549 0.111362<br>9 3.997814 1.214789 2.767198<br>9 2.493378 -0.262587 3.321675<br>9 4.036380 -0.770589 1.867553<br>8 -6.043329 0.771827 2.344268<br>1 -5.752296 1.563925 2.818246<br>1 -6.948069 0.962343 2.057993<br>8 -1.278006 2.884760 0.959902<br>1 -0.465348 2.516807 0.595013<br>1 -0.977262 3.341248 -0.241902<br>8 0.617817 1.968323 -3.642124 | [[C <sub>2</sub> H <sub>5</sub> ] <sub>3</sub> NH][TFSI] hydrate <b>3b-6H2O</b><br>B3LYP/6-31++G(d,p) OPT<br>SCRF=(PCM, Solvent=WATER)<br>\HF=-2578.9809008\<br>1 3.515215 2.793368 1.128510<br>1 4.583845 0.505664 -0.397075<br>6 2.608701 0.895174 -0.939990<br>6 2.957883 0.880622 -2.423087<br>7 3.643900 0.202450 -0.071913<br>6 3.502238 0.615531 1.382262<br>6 4.048307 2.008510 1.670778<br>6 3.566559 -1.305474 -0.219323<br>6 4.849026 -2.017416 0.193081<br>1 2.536302 1.922202 -0.582130<br>1 1.656194 0.399804 -0.737164<br>1 2.185623 1.440742 -2.957645<br>1 3.918784 1.365741 -2.615861<br>1 2.983855 -0.126939 -2.845543<br>1 2.438797 0.537025 1.619414<br>1 4.040764 -0.125955 1.972532<br>1 3.925929 2.206327 2.739467<br>1 5.113812 2.077763 1.434549<br>1 2.709031 -1.627544 0.375839<br>1 3.347104 -1.510038 -1.266674<br>1 4.701718 -3.092299 0.055920<br>1 5.692328 -1.711746 -0.432394<br>1 5.109795 -1.852278 1.241594<br>8 -2.568334 0.366919 1.627005<br>16 -1.163887 -0.035517 1.430455<br>7 -0.744294 -0.507808 -0.045192<br>16 -1.734413 -0.949260 -1.245776<br>6 -0.973721 -1.565092 2.519095<br>6 -1.096005 -2.683685 -1.624319<br>8 -0.106972 0.867264 1.921458<br>8 -3.157935 -1.121641 -0.915095<br>8 -1.388043 -0.181377 -2.456109<br>9 -1.181144 -1.222549 3.797373<br>9 -1.870087 -2.495058 2.165867<br>9 0.257332 -2.076658 2.399025<br>9 -1.757765 -3.160820 -2.687387<br>9 0.212349 -2.655703 -1.902199<br>9 -1.304871 -3.496163 -0.581480<br>8 -0.844298 2.709800 -2.181122<br>1 -0.926118 1.745940 -2.285764<br>1 -0.364829 2.853697 -1.332127<br>8 -1.920842 5.044185 0.595666<br>1 -2.395618 5.074977 1.636493<br>1 -2.529608 4.612987 0.041574<br>8 0.233412 3.337826 0.320778 | [[C <sub>2</sub> H <sub>5</sub> ] <sub>3</sub> NH][TFSI] hydrate <b>4a-6H2O</b><br>B3LYP/6-31++G(d,p) OPT<br>SCRF=(PCM, Solvent=WATER)<br>\HF=-2578.9770858\<br>1 3.619783 1.957331 -2.198158<br>1 4.957573 0.360035 -0.110948<br>6 3.779327 -1.004027 0.938096<br>6 4.705924 -2.156898 0.572198<br>7 3.939975 0.207073 0.037525<br>6 3.306056 -0.029732 -1.321598<br>6 3.832593 0.905263 -2.403892<br>6 3.373492 1.455346 0.689614<br>6 4.239110 1.996709 1.820960<br>1 2.725528 -1.285000 0.884620<br>1 3.988697 -0.668839 1.953575<br>1 4.531939 -2.970443 1.282127<br>1 4.521885 -2.551429 -0.430146<br>1 5.756918 -1.864464 0.649095<br>1 3.516588 -1.064815 -1.590449<br>1 2.227980 0.073398 -1.179665<br>1 4.910323 0.786022 -2.545662<br>1 3.337773 0.648005 -3.344656<br>1 3.281219 2.202671 -0.098361<br>1 2.369462 1.927774 1.029352<br>1 3.774662 2.914721 2.191872<br>1 4.319636 1.306644 2.664375<br>1 5.246148 2.246358 1.475175<br>8 -0.470685 0.416677 -1.733933<br>16 -1.541526 -0.561818 -1.468617<br>7 -0.749325 -0.707531 0.061677<br>16 -1.117195 -0.218950 1.327365<br>6 -0.775824 -2.229390 -1.912476<br>6 -1.703838 -1.514691 2.564942<br>8 -2.758008 -0.519649 -2.300943<br>8 0.340257 -0.380225 1.229354<br>8 -1.622278 1.061449 1.877398<br>9 -0.461337 -2.236769 -3.215293<br>9 0.333709 -2.441261 -1.195080<br>9 -1.647448 -3.215866 -1.669301<br>9 -1.099687 -1.273426 3.736546<br>9 -3.027888 -1.446837 2.734517<br>9 -1.373351 -2.741844 2.149049<br>8 -3.987159 2.388609 0.601389<br>1 -4.434222 1.710870 0.044785<br>1 -3.249179 1.931100 1.040285<br>8 0.133505 3.495664 1.444037<br>1 0.015136 3.480405 0.688993<br>1 -0.385755 2.737802 1.755086<br>8 -5.158777 0.599423 -1.169844 | [[C <sub>2</sub> H <sub>5</sub> ] <sub>3</sub> NH][TFSI] hydrate <b>4b-6H2O</b><br>B3LYP/6-31++G(d,p) OPT<br>SCRF=(PCM, Solvent=WATER)<br>\HF=-2578.9770871\<br>1 4.405048 1.964250 -1.984424<br>1 4.928268 0.376536 -0.154458<br>6 3.772939 -1.317115 -0.539602<br>6 4.988898 -2.217444 -0.360711<br>7 3.957810 0.067334 0.053675<br>6 3.003645 1.064179 -0.579848<br>6 3.420910 1.487495 -1.982643<br>6 3.801333 0.035995 1.563646<br>6 4.404179 1.249595 2.260412<br>1 3.562470 -1.181833 -1.600290<br>1 2.879992 -1.732929 -0.067496<br>1 4.764714 -3.187318 -0.813517<br>1 5.866222 -1.805136 -0.866704<br>1 5.237523 -2.394162 0.688941<br>1 2.018526 0.593600 -0.568434<br>1 2.967702 1.930953 0.079367<br>1 3.433512 0.656911 -2.692991<br>1 2.692989 2.218659 -2.345215<br>1 2.730524 -0.059129 1.755377<br>1 4.293630 -0.873722 1.907975<br>1 4.274821 1.119938 3.338693<br>1 5.475105 1.337629 2.057616<br>1 3.914643 2.186019 1.981935<br>8 -0.507579 0.317264 -1.758093<br>16 -1.618153 -0.601344 -1.444463<br>7 -2.026151 -0.706238 -1.026444<br>16 -1.079757 -0.218685 1.321122<br>6 -0.955898 -2.312980 -1.886773<br>6 -1.808856 -1.335972 2.653309<br>8 -2.857219 -0.507999 -2.238478<br>8 0.345375 -0.568163 1.232819<br>8 -1.410646 1.155427 1.768774<br>9 -0.682565 -2.354091 -3.198211<br>9 0.161876 -2.576110 -1.200183<br>9 -1.871885 -3.247221 -1.603328<br>9 -1.177542 -1.071320 3.805422<br>9 -3.116038 -1.105994 2.809207<br>9 -1.619868 -2.621402 2.338284<br>8 -3.772568 2.592726 0.605441<br>1 -4.279344 1.930080 0.082976<br>1 -3.039871 2.104257 1.018977<br>8 0.563875 3.388232 1.177785<br>1 0.348758 3.378461 0.218816<br>1 0.001197 2.690039 1.547479<br>8 -5.121230 0.827398 -1.065094 | [[C <sub>2</sub> H <sub>5</sub> ] <sub>3</sub> NH][TFSI] hydrate <b>5a-6H2O</b><br>B3LYP/6-31++G(d,p) OPT<br>SCRF=(PCM, Solvent=WATER)<br>\HF=-2578.9770851\<br>1 5.758076 -1.865085 0.648581<br>1 4.958116 0.359734 -0.109716<br>6 3.373445 1.453823 0.691364<br>6 4.238346 1.994514 1.823575<br>7 3.940557 0.206270 0.038521<br>6 3.780207 -1.005512 0.938283<br>6 4.707175 -2.157874 0.571748<br>6 3.306915 -0.029967 -1.320813<br>6 3.832163 0.906672 -2.402288<br>1 2.369290 1.190741 1.030352<br>1 3.281307 2.201804 -0.095993<br>1 3.773608 2.912261 2.194780<br>1 4.318433 1.303935 2.666608<br>1 5.245561 2.244484 1.478533<br>1 3.989397 -0.670912 1.953986<br>1 2.726488 -1.286740 0.884491<br>1 4.533625 -2.971750 1.281408<br>1 4.523103 -2.552108 -0.430703<br>1 3.518768 -1.064522 -1.590662<br>1 2.228726 0.071635 -1.178642<br>1 3.337888 0.649327 -3.343316<br>1 3.617687 1.958260 -2.195847<br>1 4.910098 0.789212 -2.543995<br>8 -0.471214 0.418165 -1.732704<br>16 -1.541878 -0.560939 -1.468826<br>7 -1.996418 -0.710022 0.061494<br>16 -1.116059 -0.221628 1.327103<br>6 -0.776357 -2.227579 -1.916372<br>6 -1.706524 -1.514990 2.565356<br>8 -2.758815 -0.517237 -2.300403<br>8 0.341099 -0.386337 1.230200<br>8 -1.618345 1.060553 1.875636<br>9 -0.461919 -2.232106 -3.219225<br>9 0.333188 -2.441100 -1.199481<br>9 -1.648030 -3.214514 -1.675336<br>9 -1.102347 -1.274192 3.737039<br>9 -3.030479 -1.443760 2.734233<br>9 -1.378800 -2.743262 2.150638<br>8 -3.984349 2.388844 0.604124<br>1 -4.432308 1.711561 0.047638<br>1 -3.246104 1.930802 1.042035<br>8 0.137220 3.494291 1.441848<br>1 0.013776 3.480385 0.466968<br>1 -0.381372 2.735845 1.752602<br>8 -5.158513 0.601220 -1.166433 | [[C <sub>2</sub> H <sub>5</sub> ] <sub>3</sub> NH][TFSI] hydrate <b>5b-6H2O</b><br>B3LYP/6-31++G(d,p) OPT<br>SCRF=(PCM, Solvent=WATER)<br>\HF=-2578.9776175\<br>1 5.992992 0.493352 2.276921<br>1 5.400628 -0.292393 -0.480868<br>6 4.566935 1.574848 -0.066785<br>6 5.200112 2.177623 -1.315378<br>7 4.495945 0.057395 -0.107480<br>6 4.318616 -0.518428 1.284869<br>6 5.600214 -0.512464 2.108530<br>6 3.393505 -0.417036 -1.036883<br>6 3.582575 -1.854002 -1.508132<br>1 5.160720 1.833691 0.810434<br>1 3.543374 1.928553 0.089343<br>1 5.241097 3.262794 -1.184571<br>1 6.222178 1.817301 -1.463072<br>1 4.623664 1.979593 -2.227212<br>1 3.525197 0.065123 1.757241<br>1 3.960157 -1.540172 1.161580<br>1 5.378435 -0.947324 3.087138<br>1 6.377531 -1.121683 1.639096<br>1 2.454888 -0.287792 -0.493817<br>1 3.390364 0.258826 -1.891950<br>1 2.761794 -2.099334 -2.187948<br>1 4.520775 -1.978400 -2.056066<br>1 3.557277 -2.577354 -0.689065<br>8 -1.361758 0.401451 -1.898894<br>16 -2.450771 -0.355494 -1.253690<br>7 -2.299976 -0.591435 0.325492<br>16 -0.913531 -0.380321 1.133205<br>6 -2.329344 -2.082487 -2.006475<br>6 -1.371859 -1.407827 2.646065<br>8 -3.845191 0.036432 -1.530565<br>8 0.287136 -1.006590 0.562200<br>8 -0.765474 1.001184 1.653255<br>9 -2.539374 -2.002335 -3.327780<br>9 -1.115768 -2.601631 -1.788541<br>9 -3.252355 -2.888251 -1.467123<br>9 -0.348068 -1.347378 3.509024<br>9 -2.469664 -0.927726 3.237665<br>9 -1.575708 -2.683093 2.300875<br>8 7.028969 -0.983864 -1.078920<br>1 7.840588 -0.631065 -0.686948<br>1 7.193322 -1.004900 -2.032556<br>8 -2.956035 3.012640 1.458546<br>1 -3.756496 2.534402 1.143265<br>1 -2.262827 2.336631 1.556300<br>8 1.386361 2.745387 0.437392 |

|                                 |                                |                                 |                                |                                 |                                |
|---------------------------------|--------------------------------|---------------------------------|--------------------------------|---------------------------------|--------------------------------|
| 1 0.646684 1.146283 -3.122837   | 1 0.154335 2.571525 0.915115   | 1 -5.745306 -0.086038 -0.822290 | 1 -5.739276 0.197458 -0.670295 | 1 -5.744519 -0.084524 -0.818552 | 1 0.848335 2.924200 -0.366208  |
| 1 -0.021898 2.546294 -3.188444  | 1 -0.482130 3.960524 0.586842  | 1 -4.406318 0.128934 -1.576582  | 1 -4.421057 0.290565 -1.483043 | 1 -4.406510 0.131077 -1.574409  | 1 0.818281 2.167704 0.971293   |
| 8 -2.367762 -1.944829 -2.583102 | 8 -4.544029 1.465611 -0.180526 | 8 -0.387078 3.369097 -1.318824  | 8 -0.224013 3.262826 -1.520721 | 8 -0.387464 3.370710 -1.320359  | 8 -5.173886 1.737188 0.372883  |
| 1 -1.520466 -1.978598 -2.104678 | 1 -4.561026 0.732435 -0.814110 | 1 -1.316078 3.698806 -1.332774  | 1 -1.120508 3.670234 -1.478932 | 1 -1.316425 3.700565 -1.332617  | 1 -5.746021 1.229132 0.963829  |
| 1 -2.176858 -2.279125 -3.469276 | 1 -3.915936 1.155626 0.497174  | 1 -0.440418 2.422846 -1.534564  | 1 -0.372288 2.315301 -1.679882 | 1 -0.441348 2.424429 -1.535859  | 1 -4.811776 1.095718 -0.267804 |
| 8 2.434125 3.460640 -2.045362   | 8 -3.278296 3.735147 -1.272125 | 8 -3.013545 4.220825 -1.164257  | 8 -2.759390 4.335788 -1.226703 | 8 6.789679 0.614715 -0.323033   | 8 -0.307100 3.164288 -1.760956 |
| 1 2.716667 2.844258 -1.346635   | 1 -3.773175 2.962071 -0.922557 | 1 -3.133732 5.117634 -0.825135  | 1 -2.788735 5.240978 -0.889873 | 1 7.096407 1.498171 -0.572525   | 1 -1.002169 3.754059 -1.385646 |
| 1 2.080930 2.885038 -2.755221   | 1 -2.476515 3.355129 -1.700899 | 1 -3.398281 3.610459 -0.484938  | 1 -3.156742 3.761936 -0.523356 | 1 7.275774 0.003379 -0.894704   | 1 -0.731771 2.296856 -1.871261 |
| 8 -0.252048 4.074195 -1.800376  | 8 6.261305 1.016341 -1.021070  | 8 6.789243 0.614284 -0.324421   | 8 6.677230 0.877298 -0.559283  | 8 -3.013693 4.222650 -1.160927  | 8 -2.248429 4.715767 -0.544212 |
| 1 0.732506 4.071015 -1.746352   | 1 6.383609 1.937472 -1.292004  | 1 7.275493 0.001799 -0.894727   | 1 7.395366 0.458782 -0.063404  | 1 -3.133776 5.119135 -0.820920  | 1 -1.946984 5.559619 -0.182677 |
| 1 -0.516923 4.977863 -2.018590  | 1 7.035472 0.802662 -0.480912  | 1 7.096327 1.497218 -0.575314   | 1 6.892379 1.820774 -0.575669  | 1 -3.397334 3.611550 -0.481602  | 1 -2.509315 4.155492 0.230599  |

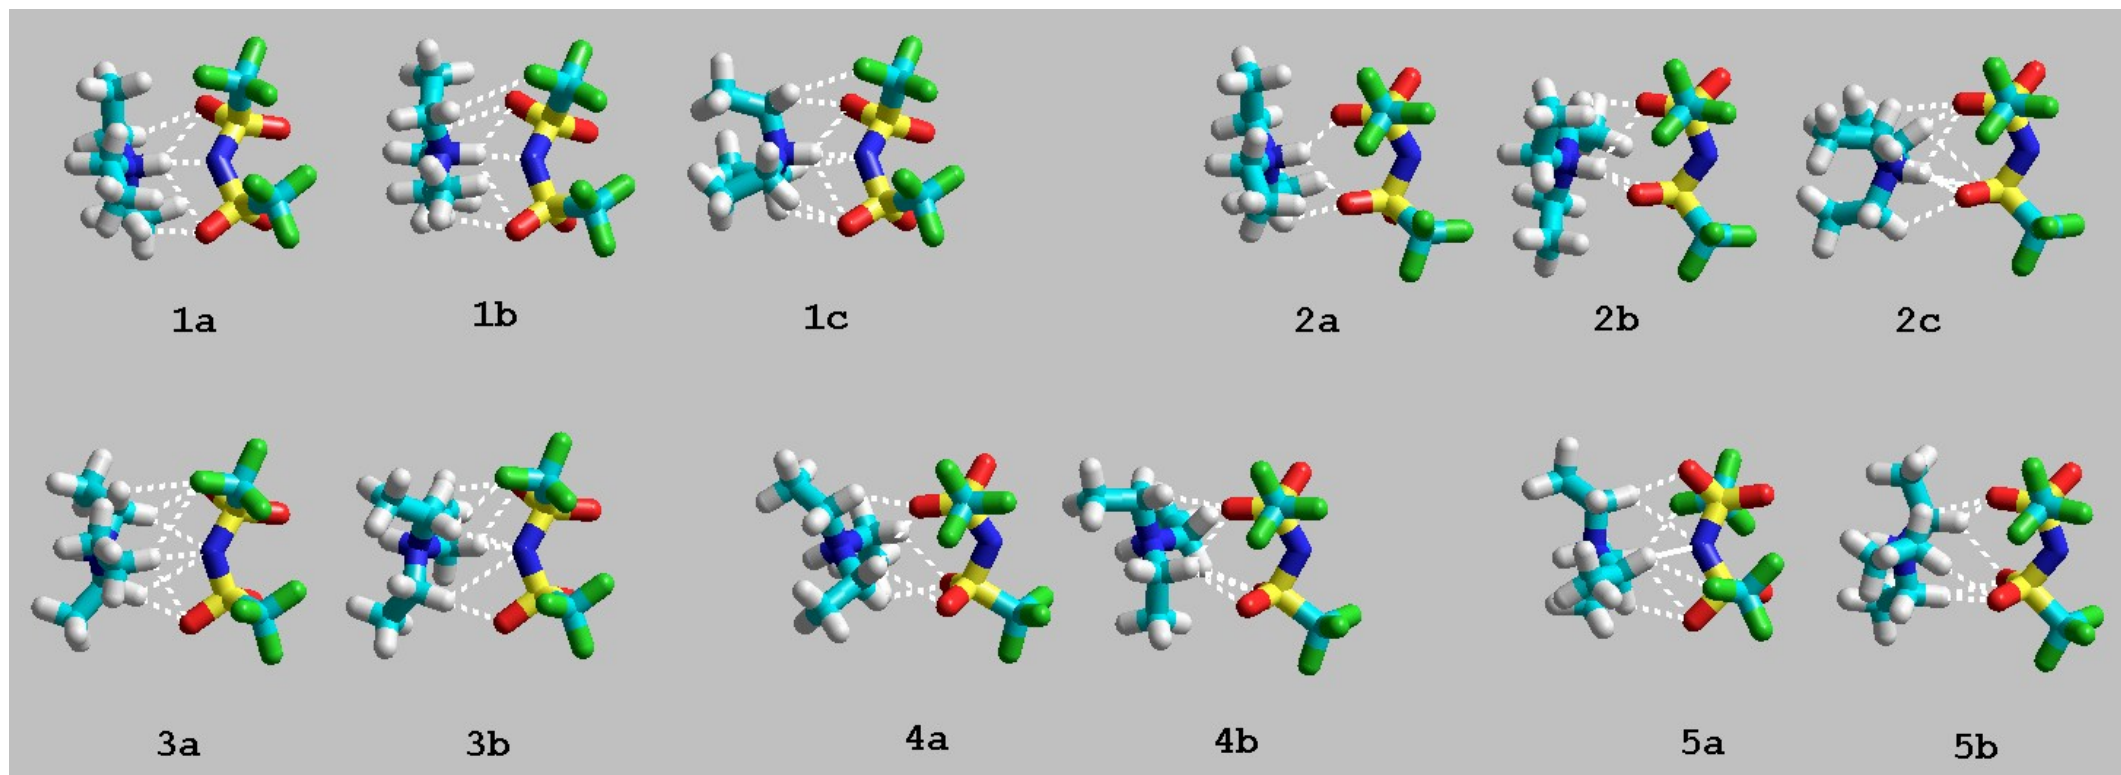

**Figure S1 1.**  $[(C_2H_5)_3NH][TFSI]$  in different dispositions and H-bonding modes. The  $N^+-H$  proton donor is directed to nitrogen and the nearest oxygen atoms (**1a – 1c**) or exclusively to the oxygen sites due to the outward orientation of the imide nitrogen (pointing away from  $N^+-H$  into the bulk solvent) (**2a – 2c**). The  $N^+-H$  proton in the outward orientation, away from the anion surface, is associated with the formation of both  $C-H\cdots N$  and  $C-H\cdots O$  (**3a – 3b**) hydrogen bonding or of just  $C-H\cdots O$  (**4a – 4b**) hydrogen bonding. The  $N^+-H$  proton is in the same orientation as in **3a – 4b**, but with extra  $C-H\cdots F$  bonds (**5a – 5b**).

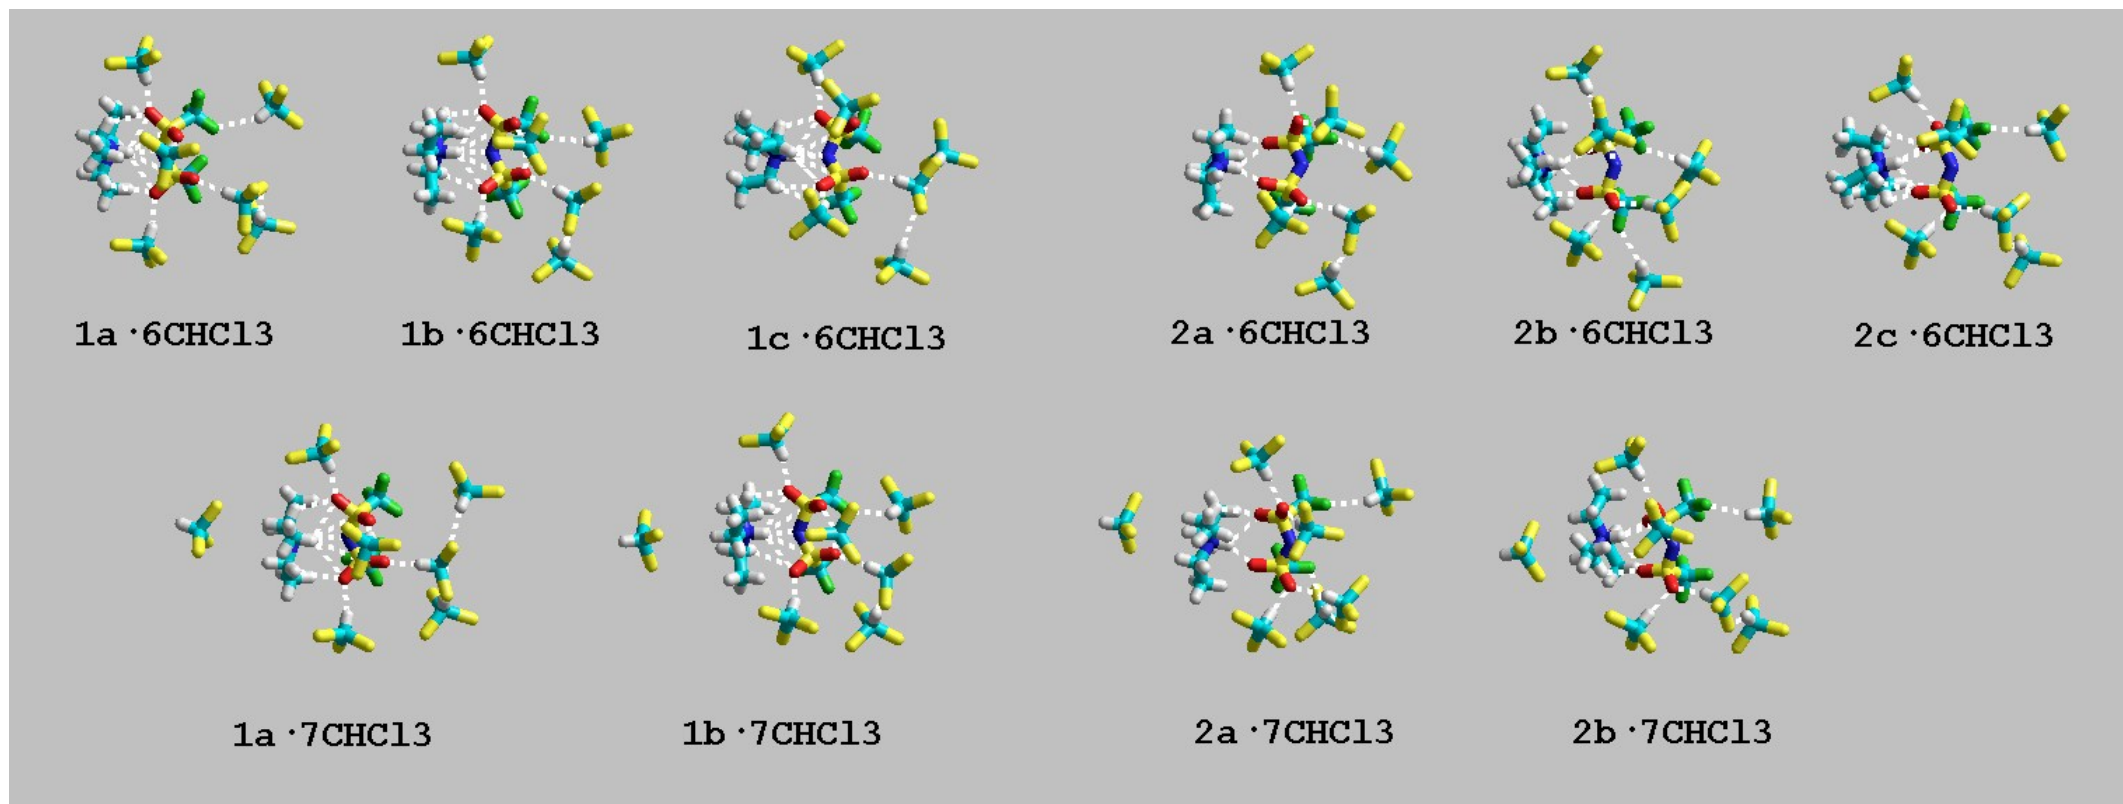

**Figure SI 2.**  $[(C_2H_5)_3NH][TFSI]$  ion pairs as chloroform solvates with the coordination of six ( $1a \cdot 6CHCl_3$ - $2c \cdot 6CHCl_3$ , top) or seven ( $1a \cdot 7CHCl_3$ - $2b \cdot 7CHCl_3$ , bottom) molecules of solvent.

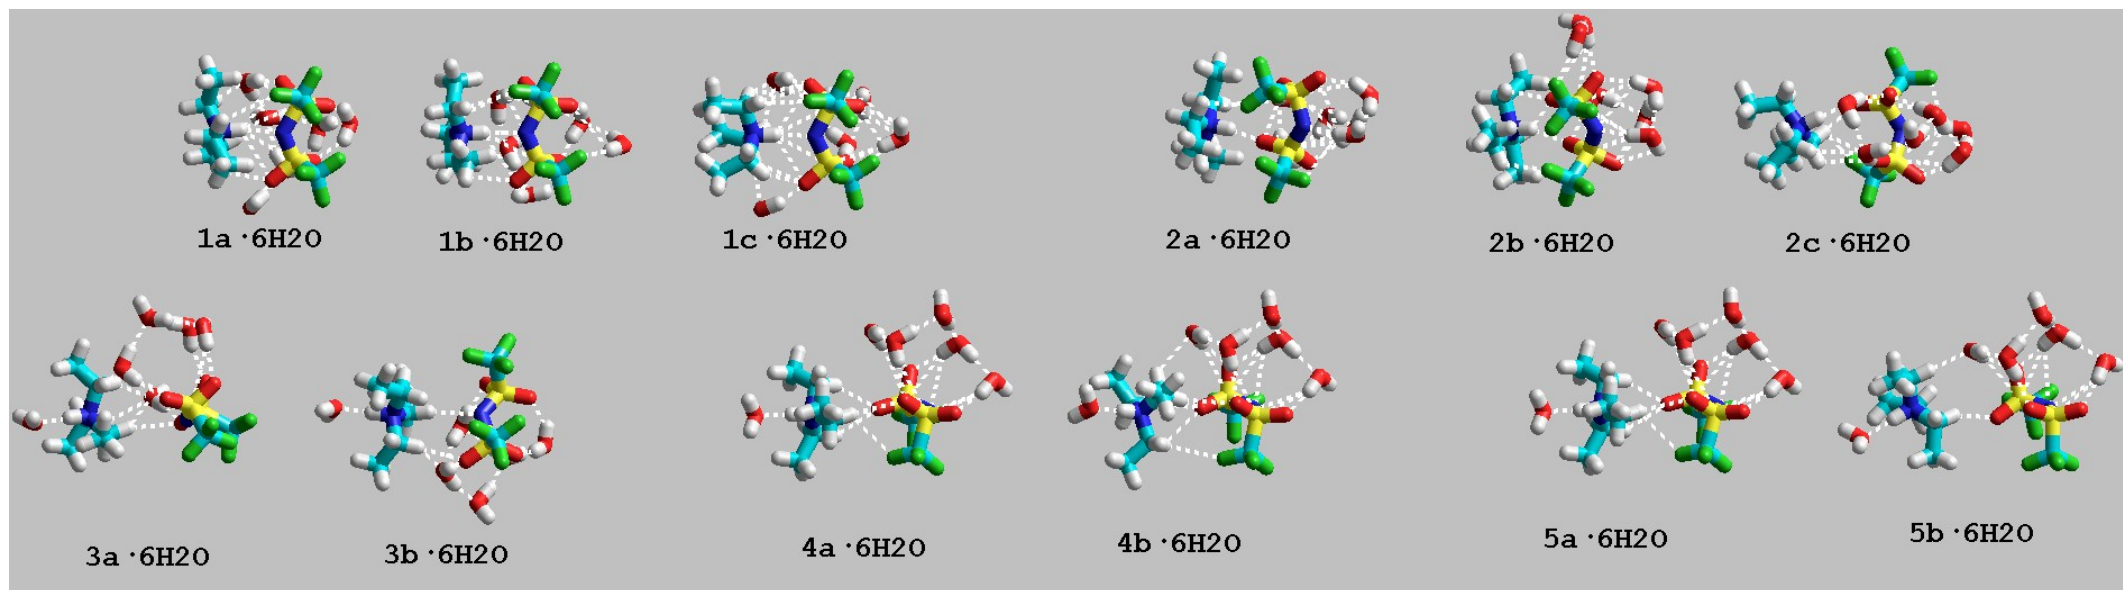

**Figure SI 3.**  $[(C_2H_5)_3NH][TFSI]$  ion pairs as hydrates with the coordination of explicit solvent as a first hydration shell, with six (1a·6H<sub>2</sub>O-2c·6H<sub>2</sub>O, top) or seven (1a·6H<sub>2</sub>O - 2b·6H<sub>2</sub>O, bottom) molecules of solvent.
